1 **Emergence and global spread of *Listeria monocytogenes* main clinical clonal complex**

2

3 Alexandra Moura<sup>1,2,3,\*</sup>, Noémie Lefrancq<sup>4,†</sup>, Alexandre Leclercq<sup>1,2</sup>, Thierry Wirth<sup>5,6</sup>, Vítor Borges<sup>7</sup>,  
4 Brent Gilpin<sup>8</sup>, Timothy J. Dallman<sup>9</sup>, Joachim Frey<sup>10</sup>, Eelco Franz<sup>11</sup>, Eva M. Nielsen<sup>12</sup>, Juno Thomas<sup>13</sup>,  
5 Arthur Pightling<sup>14</sup>, Benjamin P. Howden<sup>15</sup>, Cheryl L. Tarr<sup>16</sup>, Peter Gerner-Smidt<sup>16</sup>, Simon  
6 Cauchemez<sup>4</sup>, Henrik Salje<sup>4,†,#</sup>, Sylvain Brisse<sup>17,#</sup>, Marc Lecuit<sup>1,2,3,18,#,\*</sup> for the *Listeria* CC1 Study  
7 Group

8

9 <sup>1</sup> Institut Pasteur, Biology of Infection Unit, Paris, France

10 <sup>2</sup> Institut Pasteur, French National Reference Centre and WHO Collaborating Centre *Listeria*, Paris, France

11 <sup>3</sup> Inserm U1117, Paris, France

12 <sup>4</sup> Institut Pasteur, Mathematical Modelling of Infectious Diseases Unit, UMR2000, CNRS, Paris, France.

13 <sup>5</sup> Institut Systématique Evolution Biodiversité (ISYEB), Museum National d'Histoire Naturelle, CNRS,  
14 Sorbonne Université, Université des Antilles, EPHE, Paris, France

15 <sup>6</sup> PSL University, EPHE, Paris, France

16 <sup>7</sup> National Institute of Health Dr. Ricardo Jorge, Department of Infectious Diseases, Lisbon, Portugal

17 <sup>8</sup> Institute of Environmental Science and Research Limited, Christchurch Science Centre, Christchurch,  
18 New Zealand

19 <sup>9</sup> Public Health England, London, UK

20 <sup>10</sup> Vetsuisse, University of Bern, Bern, Switzerland

21 <sup>11</sup> National Institute for Public Health and the Environment (RIVM), Centre for Infectious Disease Control,  
22 Bilthoven, Netherland

23 <sup>12</sup> Statens Serum Institut, Copenhagen, Denmark

24 <sup>13</sup> National Institute for Communicable Diseases, Division of the National Health Laboratory Service,  
25 Johannesburg, South Africa

26 <sup>14</sup> Biostatistics and Bioinformatics, Center for Food Safety and Applied Nutrition, U.S. Food and Drug  
27 Administration, College Park, Maryland, United States

28 <sup>15</sup> Microbiological Diagnostic Unit Public Health Laboratory, Department of Microbiology and  
29 Immunology, The Doherty Institute for Infection and Immunity, University of Melbourne, Victoria,  
30 Australia; Infectious Diseases Department, Austin Health, Heidelberg, Victoria, Australia

31 <sup>16</sup> Centers for Disease Control and Prevention, Atlanta, Georgia, United States

32 <sup>17</sup> Institut Pasteur, Biodiversity and Epidemiology of Bacterial Pathogens Unit, Paris, France

33 <sup>18</sup> Université de Paris, Necker-Enfants Malades University Hospital, Division of Infectious Diseases and  
34 Tropical Medicine, Institut Imagine, APHP, Paris, France

35

36 † Current address: Department of Genetics, University of Cambridge, Cambridge, UK

37 # Shared senior authorship

38 \* Correspondence: [amoura@pasteur.fr](mailto:amoura@pasteur.fr); [marc.lecuit@pasteur.fr](mailto:marc.lecuit@pasteur.fr)

39 **Abstract**

40 Retracing microbial emergence and spread is essential to understanding the evolution and  
41 dynamics of pathogens. The bacterial foodborne pathogen *Listeria monocytogenes* clonal  
42 complex 1 (*Lm*-CC1) is the most prevalent clonal group associated with listeriosis, and is  
43 strongly associated with cattle and dairy products. Here we analysed 2,021 *Lm*-CC1  
44 isolates collected from 40 countries, since the first *Lm* isolation to the present day, to  
45 define its evolutionary history and population dynamics. Our results suggest that *Lm*-CC1  
46 spread worldwide from North America following the Industrial Revolution through two  
47 waves of expansion, coinciding with the transatlantic livestock trade in the second half of  
48 the 19<sup>th</sup> century and the rapid growth of cattle farming in the 20<sup>th</sup> century. *Lm*-CC1 then  
49 firmly established at a local level, with limited inter-country spread. This study provides  
50 an unprecedented insight into *Lm*-CC1 phylogeography and dynamics and can contribute  
51 to effective disease surveillance to reduce the burden of listeriosis.

52 *Listeria monocytogenes* (*Lm*) is a foodborne bacterial zoonotic pathogen that can  
53 cause listeriosis, a severe infection with a high case-fatality rate in immunocompromised  
54 individuals<sup>1,2</sup>. Molecular studies have shown the clonal population structure of *Lm*<sup>3,4</sup> and  
55 the worldwide distribution of clonal complex 1 (*Lm*-CC1, initially called epidemic clone  
56 ECI<sup>5,6</sup>), a serotype 4b cosmopolitan clonal group defined by multilocus sequence typing  
57 (MLST), which was first isolated from an Italian soldier with meningitis during the first  
58 world war (WWI)<sup>7,8</sup>. Interestingly, *Lm*-CC1 has been reported as the most prevalent  
59 clinical clonal complex in several countries<sup>9-14</sup>, and data collected on NCBI Sequence  
60 Read Archive also support this conclusion (**Supplementary Figure S1**).

61 While there is no inter-human transmission of listeriosis, it was only in the mid  
62 1980's that the foodborne origin of human listeriosis was formally proven<sup>15</sup>. Since then,  
63 *Lm*-CC1 has been reported in different food matrixes, including dairy products<sup>16-18</sup> which  
64 can be heavily contaminated<sup>19</sup> and constitute a major source of human listeriosis<sup>20,21</sup>.  
65 Previous studies have also demonstrated the hypervirulence of *Lm*-CC1<sup>9</sup>, and its higher  
66 efficiency in gut colonization and fecal shedding, compared to hypovirulent *Lm*  
67 clones<sup>16,17,22,23</sup>. Moreover, increasing evidence suggests that cattle, which are frequent *Lm*  
68 asymptomatic carriers<sup>24-28</sup> and contribute to *Lm* enrichment in soils<sup>25</sup>, may constitute a  
69 reservoir for *Lm*-CC1. In addition to *Lm* subclinical infections that may contaminate  
70 milk<sup>23,26</sup>, the long-term persistence of *Lm* in cattle manure-amended soils<sup>29</sup> also poses  
71 serious risks of transmission to fresh produce.

72 Understanding the global evolution of *Lm*-CC1, which is now spread over all  
73 continents<sup>6</sup>, as well as its emergence and dissemination across different spatial levels is  
74 critical to understand *Lm* population dynamics and to develop better control strategies,  
75 especially in countries with ageing and/or immunosuppressed populations who are most  
76 at risk for severe infection. However the complex movement of livestock and food

77 products associated with asymptomatic intestinal colonization complicates traditional  
78 epidemiological investigations aimed to decipher *Lm* epidemiology by linking isolates in  
79 space and time.

80 Here we took a population biology approach to fill this knowledge gap and  
81 conducted the largest genomic *Lm*-CC1 study to date, combining genomic and  
82 evolutionary approaches to decipher its evolutionary history and pattern of emergence  
83 and spread.

84

## 85 **Results**

86 ***Lm*-CC1 is composed of 3 sublineages of uneven prevalence.** We analyzed 2,021  
87 genomes, including 1,230 newly sequenced isolates, originating from 40 countries in 6  
88 continents and diverse sources (**Figure 1a; Supplementary Table S1**). We covered a  
89 time span of 98 years, from the first *Lm* isolation to the present time (1921-2018), and  
90 included all contemporary clinical isolates collected between 2012 and mid-2017 within  
91 the surveillance framework of 7 countries over 3 continents (**Figure 1a,b**).

92 *Lm*-CC1 genome sizes ranged from 2.77 to 3.25 Mbp, with an average number of  
93 2,879±77 coding sequences and G+C content of 37.7-38.3% (**Supplementary Figure**  
94 **S2**). On the basis of MLST<sup>4</sup>, 58 sequence types (STs) could be distinguished, with ST1  
95 representing 91% ( $n=1838$ ) of isolates. On the basis of core genome MLST (cgMLST)<sup>30</sup>,  
96 we identified within *Lm*-CC1 867 cgMLST types, 92% of which were country-specific  
97 (**Supplementary Figure S3**). Rarefaction analysis based on cgMLST resampling did not  
98 reach an asymptote (**Supplementary Figure S3**), indicating that despite the high number  
99 of sequences obtained in this study, a significant amount of *Lm*-CC1 diversity remains  
100 undetected.

101 To better understand the phylogenetic diversity of *Lm*-CC1, we built maximum  
102 likelihood phylogenies and identified 3 sublineages (SL1, SL404 and SL150, named  
103 based on their smallest ST number). These sublineages have highly uneven frequency  
104 (**Figure 1c,d; Supplementary Figure S4**), with SL1 ( $n=2002$ , isolated worldwide)  
105 representing 99.1% of the isolates, while 0.1% are SL404 ( $n=2$ , found in Europe and  
106 North America) and 0.8% represent SL150 ( $n=17$ , found in North America, Africa and  
107 Asia). Within SL1, we further identified 8 distinct genetic clades, which we named GC1  
108 to GC8 by decreasing prevalence (**Figure 1; Supplementary Figure S4**). The average  
109 genetic distance was  $1166\pm 134$  wgSNPs (and  $478\pm 20$  cgMLST alleles) between *Lm*-CC1  
110 sublineages, and  $76\pm 16$  wgSNPs (and  $40\pm 9$  cgMLST alleles) within SL1 clades  
111 (**Supplementary Table S2; Supplementary Figure S5**). The finding that SL1 is by far  
112 the major sublineage in *Lm*-CC1 is consistent with either its increased virulence and/or  
113 transmission or that SL404 and SL150 are restricted to some yet unknown ecological  
114 niches. Within SL1, all different genetic clades were well represented, with strong spatial  
115 structure: GC1 is the most prevalent clade in Europe (48%, 593/1237), Asia (68%, 17/25)  
116 and South America (64%, 14/22); GC2 is the most prevalent clade in North America  
117 (29%, 150/512) and Oceania (52%, 84/163), while GC3 is the most prevalent clade in  
118 Africa (80%, 43/54) (**Figure 1e; Supplementary Figure S6**).

119

120 **The *Lm*-CC1 pangenome is diverse.** Analysis of *Lm*-CC1 pangenome identified 10,789  
121 orthologous coding sequences (BlastP identity cut-off of  $\geq 95\%$ ), 2,649 of which (92% of  
122 the average isolate genome content) present in at least 95% of isolates (core genome)  
123 (**Supplementary Figure S7**). The accessory genome included 8,140 gene families, of  
124 which 2,844 (35%) were unique to one isolate, and was enriched in transcription,  
125 replication/repair and cell wall functions, as well as in gene families of unknown function

126 **(Supplementary Figure S7)**. Plasmids were present in 6% (120/2021) of isolates, and  
127 were more prevalent in GC7 (83%, **Supplementary Figure S7**). Intact prophages were  
128 present in 62% isolates (1263/2021), and were distributed across the breadth of CC1  
129 phylogeny, except in SL404 (**Supplementary Figure S7**). In contrast to *Listeria*  
130 pathogenic islands LIPI-1<sup>31</sup> and LIPI-3<sup>32</sup> which were present in all isolates, the *Listeria*  
131 genomic island LGI2-1<sup>33</sup>, previously identified in CC1 isolates encoding resistance to  
132 cadmium and arsenic, was present in 14% (277/2021) isolates and only in GC3 (80%,  
133 225/283), GC5 (60%, 38/63) and SL150 (82%, 14/17; **Supplementary Figure S7**).  
134 Sublineage-specific genes were detected ( $n=81$ ; **Supplementary Tables S3 and S4**) and  
135 pangenome-wide association analyses identified 24 genes that are associated with a  
136 clinical origin (**Supplementary Table S5**). The impact of these traits on isolates'  
137 differential ecology or virulence remains to be studied, yet the presence of human isolates  
138 in all sublineages and clades shows that pathogenic isolates are not restricted to a specific  
139 *Lm*-CC1 clade.

140

141 **Emergence and worldwide spread of *Lm*-CC1 main sublineage (SL1) occurred in the**  
142 **last 200 years.** To understand *Lm*-CC1 evolution and spread, we performed temporal and  
143 phylogeographic analyses on a subset of 200 genomes representative of *Lm*-CC1 genetic  
144 and geographic diversity using BEAST<sup>34</sup>, and on the full dated dataset (1,972 *Lm*-CC1  
145 genomes) using Treedater<sup>35</sup> (**Supplementary Figures S8 and S9**) and PastML<sup>36</sup>, under  
146 an uncorrelated relaxed clock model (see Material and Methods for details). We estimate  
147 a core genome substitution rate of  $1.95 \times 10^{-7}$  substitutions/site/year (95% CI:  $1.75 \times 10^{-7}$ -  
148  $2.15 \times 10^{-7}$ ; **Supplementary Figure S8**), consistent with previous findings<sup>30</sup>. We estimate  
149 that *Lm*-CC1 originated about 1,800 years ago (date: 197 AD; 95% CI: 860 BC - 1045  
150 AD; **Figure 2b**) and infer that its last common ancestor evolved in North America

151 **(Supplementary Figure S10)**, long before European colonization and the introduction of  
152 cattle in the Americas at the end of the 15<sup>th</sup> century<sup>37</sup>. Even though the low number of  
153 genomes available for Asia, Africa and South America could bias this estimation, the  
154 estimated origin was also supported by the measures of population variability, which  
155 showed higher genetic diversity within North America (**Supplementary Figure S5**;  
156 **Supplementary Table S2**), and by the basal position of North American *Lm*-CC1  
157 isolates in the phylogeny (**Figure 2b, Supplementary Figure S10**). Whether *Bison bison*  
158 populations, which are phylogenetically and ecologically related to bovine and dominated  
159 North American prairies prior to colonization by the Europeans and their livestock,  
160 played a role in its dispersion remains unknown.

161 Demographic analyses performed using the Bayesian Skyline Plot method<sup>38</sup>  
162 (**Figure 2a**) show that *Lm*-CC1 effective population size was stable up to the middle of  
163 the 19<sup>th</sup> century, followed by two waves of expansion: the first in the late 1880s and the  
164 second in the 1930s, coinciding with the first and second ages of globalization,  
165 respectively. Tajima's D statistic<sup>39</sup> also supported a recent CC1 population expansion and  
166 SL1 emergence ( $D < 0$ ; **Supplementary Table S2**). SL1 emerged in North America  
167 approximately 160 years ago (date: 1859, 95% CI: 1821-1889), thus closely following the  
168 start of the Industrial Revolution (**Figure 3**). The first SL1 introductions into Europe  
169 occurred around 1868 (GC6/GC8 ancestor, 95% CI: 1827-1890), 1871 (GC3/GC7  
170 ancestor, 95% CI: 1838-1905) and 1889 (GC2, 95% CI: 1852-1909), concomitant with  
171 the 1870 North Atlantic Meat trade agreement<sup>40</sup>. Under this agreement, surplus cattle in  
172 North America were shipped to Europe, which had experienced severe livestock  
173 shortages due to widespread disease outbreaks (contagious bovine pleuropneumonia and  
174 foot and mouth disease), leading to an unprecedented man-made 1000-fold increase in  
175 cattle movement From North America to Europe<sup>41</sup>. Within the same period, intra-

176 continental diversification also took place, likely driven by cattle movements across  
177 North America and railway expansion in North America and Europe. The first SL1  
178 introductions that occurred in Oceania (1903, GC2) followed the ‘Great Drought’ of  
179 1895-1903, which severely affected livestock<sup>42</sup>.

180 In the following decades and after WWI, multiple CC1 introductions continued  
181 from North America into Europe (GC1, GC4, GC5 and GC8) and Asia (GC3) and from  
182 Europe to Africa (GC3) (**Figure 3a-b**). The rate of intercontinental bacterial movement  
183 declined after 1930s (**Figure 3c**), concomitant with the protectionist trade policies that  
184 followed the ‘Great Depression’, which led to a sharp reduction of livestock exports from  
185 the USA during the first half of the 20<sup>th</sup> century<sup>43</sup>. A second wave of SL1 expansion  
186 occurred after this period, likely driven by a new increase in intercontinental movements  
187 favoured by the industrialization of food production and globalization of the food and  
188 cattle trades (**Figures 2a; Supplementary Figure S11**). Other important human  
189 pathogens that have a zoonotic reservoir such as *Escherichia coli* O157:H7<sup>44</sup> and  
190 *Campylobacter jejuni* ST61<sup>45</sup>, have been estimated to have most recent common  
191 ancestors (MRCA) at similar times and to have undergone population expansions in the  
192 context of animal trade or intensive cattle farming, respectively.

193 A stabilization and relative decline of *Lm*-CC1 population is observed after 1984  
194 (**Figure 2a**), coincident with the major advances in infectious diseases’ prevention in  
195 dairy cattle<sup>46</sup> and with the relative decrease of the dairy cattle population in Western  
196 countries, in particular Europe (**Supplementary Figure S11**). It also coincides with the  
197 time when human listeriosis foodborne origin was formally proven<sup>15</sup>, which led to the  
198 implementation of surveillance programs in North America and Europe<sup>47-50</sup>, in particular  
199 in the dairy sector following cheese and milk related *Lm*-CC1 outbreaks<sup>51</sup>. Whether these



200 findings can be observed in other dairy-associated *L. monocytogenes* clonal complexes,  
201 such as CC6 (lineage I) or CC37 and CC101 (lineage II)<sup>17,52</sup> will deserve future studies.

202

203 **Recent SL1 transmission chains are mostly local.** To further analyze more recent strain  
204 transmission dynamics, we compared the genetic diversity of SL1 isolates from 2010-  
205 2018 ( $n=1,266$ ) across different spatial scales. To avoid oversampling isolates from  
206 outbreak investigations, we excluded all non-clinical isolates from confirmed outbreaks  
207 ( $n=91$  isolates from 19 outbreaks). We find that pairs of isolates present within the same  
208 2-year period and the same country are 18.7 times (95% CI: 4.7-190.7) more likely to  
209 have their MRCA within the past 5 years than pairs of isolates coming from other intra-  
210 continental countries >1,000 km apart (**Figure 4a**). Furthermore, we observe no  
211 difference in the probability of having a recent MRCA in isolates coming from nearby  
212 intracontinental countries (<1,000km) than from further apart. Isolates coming from  
213 different continents are about 100 times less likely to have an MRCA within the past 5  
214 years (0.2; 95% CI: 0.01-2.9) than isolates from the same countries (18.7; 95% CI: 4.7-  
215 190.7) (**Figure 4a**). This strong local spatial structure persists for very long time periods,  
216 with complete mixing of isolates within a continent appearing only after 50 years (**Figure**  
217 **4a**). At a finer spatial scale, available for France (“*départements*”, sub-regional  
218 administrative division in France, **Supplementary Figure S12**), a strong local spatial  
219 structure is also evident, with the proportion of genetically close pairs of clinical cases  
220 being higher between isolates coming from the same French department (4.4%, 95%  
221 CI: 1%-10.6%) than between isolates coming from different departments (0.2%, 95% CI  
222 0.04%-0.5%), with no effect of distance between them (**Figure 4b**). As expected, in  
223 densely urban areas with no farming, such as the city of Paris, clinical strains are  
224 significantly less likely to share a recent MRCA than in rural areas or other departments

225 (0.0%, 95% CI: 0.0%-4.4% vs. 3.9%, 95% CI: 1.0%-9.5%) (**Figure 4c**). This result is  
226 consistent with urban infections being driven by unrelated *Lm* introductions originating  
227 from across the country. Spatial dependence between French isolates persists for 20 years  
228 (**Supplementary Figure S13**), with on average 20 (1/0.05) different sources of human  
229 infection present at any one time per department (**Figure 4b**).

230

## 231 **Discussion**

232 Understanding pathogen evolutionary history is essential to understand the population  
233 dynamics and biodiversity of microbial infectious agents, and for effective disease  
234 surveillance. Here, we have shown that *Lm*-CC1 has spread worldwide following the  
235 Industrial Revolution, and that genotypes are now firmly established at a local level, with  
236 decades-long localized persistence. These results are consistent with the establishment of  
237 separate, locally entrenched sources of *Lm*-CC1 with limited flow of bacteria either  
238 within or between countries, in line with cgMLST analyses in which 92% of clusters are  
239 country-specific.

240 In the absence of inter-human transmission, this observation likely represents  
241 persistent infection sources, *i.e.* individual herds and/or production facilities, in which *Lm*  
242 can reside for several years<sup>28,53</sup>. Outbreak investigations performed at local scale,  
243 including in farm environments, would therefore likely improve the identification of  
244 contaminating sources, which remain unknown in about 80% of clusters of human  
245 cases<sup>54</sup>. Identifying and eradicating sources along the food chain, from the farm to the  
246 fork, could lead to significant long-term reductions in the transmission of the *Lm*-CC1.

247 The current scarcity of genomes available for Asia, Africa and South America,  
248 and from natural and animal reservoirs may overlook other CC1 clades and could have  
249 biased our phylogeographic analyses. Nevertheless, this study sheds unprecedented light

250 onto the evolutionary history, epidemiology and population dynamics of *Lm*-CC1. Similar  
251 approaches targeting other major globally distributed clonal complexes will allow  
252 clarifying their transmission dynamics and uncovering epidemiological specificities of  
253 *Lm* clones. Deciphering the dynamics and drivers of *Lm* sublineages across time and  
254 space will inform infection control policies and ultimately reduce the burden of listeriosis.

255

## 256 **Methods**

257 **Bacterial isolates and genome sequencing.** A total of 2,021 high quality *Listeria*  
258 *monocytogenes* clonal complex 1 (CC1) genomes collected by this study group ( $n=1,230$ )  
259 and from NCBI repositories ( $n=791$ , as of 14 March 2018) were analyzed. These were  
260 part of an initial dataset of 2,154 CC1 genomes, from which 133 were discarded due to  
261 low sequencing coverage ( $<40X$  after read trimming,  $n=62$ ) or low assembly quality  
262 ( $>200$  contigs and/or  $N50<20Kb$ ,  $n=71$ )<sup>30</sup>. The 2,021 isolates originated from human  
263 ( $n=1,453$ ; 72%) and animal hosts ( $n=44$ ; 2%), food ( $n=387$ ; 19%), food-processing  
264 environments ( $n=88$ ; 4%), feed ( $n=11$ ; 0.5%), natural environments ( $n=11$ ; 0.6%) or  
265 from unknown sources ( $n=27$ ; 1%) (**Figure 1; Table S1**). Isolates were sampled in 40  
266 countries from 6 continents, between 1921 and 2018 (**Figure 1; Table S1**). Between 2012  
267 and mid-2017, exhaustive sampling was obtained for 7 countries in 3 continents in the  
268 context of listeriosis national surveillance programs in Australia ( $n=75$ ), Denmark  
269 ( $n=42$ ), France ( $n=395$ ), The Netherlands ( $n=53$ ), New Zealand ( $n=34$ ), the United  
270 Kingdom ( $n=106$ ) and the United States ( $n=317$ ). Sequencing reads were obtained using  
271 Illumina sequencing platforms (Illumina, San Diego, US) and 2x50 bp ( $n=110$ ), 2x75 bp  
272 ( $n=2$ ), 2x100 bp ( $n=233$ ), 2x125 bp ( $n=9$ ), 2x150 bp ( $n=1,145$ ), 2x250 bp ( $n=351$ ),  
273 2x300 bp ( $n=138$ ) paired-end runs (**Table S1**).

274

275 **Sequence analysis.** Whole genome sequencing reads were available for 1,988 out of  
276 2,021 isolates. Reads were trimmed from adapter sequences and non-confident bases  
277 using AlienTrimmer v.0.4<sup>55</sup> (minimum read length of 30 bases and minimum quality  
278 Phred score 20, i.e. 99% base call accuracy) and corrected with Musket v.1.1<sup>56</sup>,  
279 implemented in fqCleaner v.3.0 (Alexis Criscuolo, Institut Pasteur). FastQC v.0.11.5<sup>57</sup>  
280 was used to assess sequence quality before and after trimming. Assemblies were obtained  
281 from paired-ended trimmed reads  $\geq 75$  bp ( $n=1,878$  isolates) by using SPAdes v.3.11.0<sup>58</sup>  
282 with the automatic *k-mer*, *--only-assembler* and *--careful* options. For paired-ended  
283 trimmed reads of 50 bp ( $n=111$ ), assemblies were built using CLC Assembly Cell v.5.0.0  
284 (Qiagen, Denmark), with estimated library insert sizes ranging from 50 to 850 bp. Contigs  
285 smaller than 500 bp were discarded from both SPAdes and CLC generated assemblies.

286

287 **Pangenome analysis.** Gene prediction and annotation was carried out from the draft  
288 assemblies using Prokka v.1.12<sup>59</sup>. Functional classification was carried out with EGGnog-  
289 mapper v2<sup>60</sup> using DIAMOND (Double Index Alignment of Next-generation sequencing  
290 Data)<sup>61</sup>. The presence of plasmids, intact prophages and *Listeria* genomic regions was  
291 inferred from the assemblies using MOB-suite v.2.0.1<sup>62</sup>, PHASTER (<https://phaster.ca/>)<sup>63</sup>  
292 and BIGSdb-*Lm* (<http://bigsdb.pasteur.fr/listeria/>)<sup>30,64</sup>, respectively. Pangenome analyses  
293 were carried out using Roary v.3.12<sup>65</sup> with an amino acid identity cut-off of 95% and  
294 splitting homologous groups containing paralogs into groups of true orthologs. Venn  
295 diagrams were obtained using Venny 2.1 (Oliveros, 2007). Pangenome-wide association  
296 analyses were performed using treeWAS v.1.0<sup>66</sup>, to control for phylogenetic structure,  
297 using a significance threshold of  $p < 10^{-5}$ .

298

299 ***In silico* molecular typing.** PCR-serogrouping (5 loci)<sup>67</sup>, MLST (7 loci)<sup>4</sup> and cgMLST  
300 (1748 loci)<sup>30</sup> profiles were extracted from draft assemblies using the BIGSdb-*Lm*  
301 platform (<http://bigsdb.pasteur.fr/listeria/>) as previously described<sup>30</sup>. Profiles were  
302 compared using the single linkage clustering method implemented in BioNumerics v.7.6  
303 (Applied-Maths). cgMLST profiles were classified into cgMLST types (CT) and  
304 sublineages (SL) using previous defined cut-offs (7 and 150 allelic mismatches,  
305 respectively, out of 1748 loci)<sup>30</sup>. Rarefaction curves were computed with vegan v. 2.5-6<sup>68</sup>  
306 R package, estimated with the rarefaction function (Joshua Jacobs,  
307 [joshuajacobs.org/R/rarefaction](http://joshuajacobs.org/R/rarefaction)) using 100 random samples per point.

308

309 **Phylogenetic analyses.** Core genome multiple sequence alignments were built from the  
310 1748 cgMLST loci concatenated sequences<sup>30</sup>. Briefly, individual allele sequences were  
311 translated into amino acids, aligned separately with MUSCLE v.3.8.31<sup>69</sup> and back-  
312 translated into nucleotide sequence alignment. Concatenation of the 1748 loci alignments  
313 resulted in a multiple sequence alignment of 1.57 Mb.

314 In parallel, whole genome SNP (wgSNP)-based alignments were built from trimmed  
315 reads and NCBI assemblies using the Snippy v.4.1.0 pipeline  
316 (<https://github.com/tseemann/snippy>). The closed CC1 genome F2365 (accession no.  
317 NC\_002973.6), from the 1985 Canadian cheese outbreak<sup>70</sup> was used as reference in read  
318 mapping, resulting in an alignment of 2.29 Mb.

319 Gubbins v.2.2.0<sup>71</sup> was used to detect recombination regions in both core and whole-  
320 genome alignments, using default parameters and a minimum of 3 base substitutions  
321 required to identify recombination. Alignment regions positive for recombination were  
322 then completely removed from the original alignments, resulting in recombination-free  
323 core- and whole-genome alignments of 1.29 Mb and 2.28 Mb, respectively. Maximum

324 likelihood phylogenies were obtained from the recombination-purged alignments using  
325 IQ-tree v.1.6.7.2<sup>72</sup> under the determined best-fit nucleotide substitution model  
326 (GTR+F+G4<sup>73</sup>, as determined by ModelFinder<sup>74</sup>) and ultrafast bootstrapping of 1000  
327 replicates<sup>75</sup>. Trees were visualized and annotated with ggtree v.1.14.6<sup>76</sup> and iTol v.4.2<sup>77</sup>.  
328 To measure the degree of genetic variation within sublineages, genetic clades and  
329 geographic locations, the pairwise allelic and SNP distance matrices were calculated from  
330 the cgMLST profiles and multiple sequence alignments, respectively. SNP distances were  
331 computed taking into account only the ATGC polymorphic positions, extracted from the  
332 alignments using SNP-sites v.2.4.1<sup>78</sup>.  
333 The nucleotide diversity and the Tajima's D statistics per alignment were calculated using  
334 the R package PopGenome v.2.6.1<sup>79</sup>.

335

336 **Demographic and spatio-temporal analysis.** To infer the population size changes,  
337 Bayesian skyline plots were obtained with BEAST v1.10.4<sup>34</sup>. The coalescent Bayesian  
338 skyline model was chosen due to its flexibility to allow a wide range of demographic  
339 scenarios, avoiding the biases of pre-specified parametric models in the estimates of  
340 demographic history<sup>38</sup>. Analyses were performed on a random subset of 200 isolates  
341 selected out a subset of 422 isolates representative of genomic and geographic diversity  
342 of the full dataset (1 isolate per country per cluster of 99% core genome similarity).  
343 Sampling times were positively correlated with the genetic divergence ( $p < 0.05$ , F-  
344 Statistic test; Supplementary Figure S6), as observed using TempEst v1.5.1<sup>80</sup>. BEAST  
345 estimations were made using the nucleotide evolutionary model GTR+Γ4 and a default  
346 gamma prior distribution of 1, under an uncorrelated relaxed clock model, to allow each  
347 branch of the phylogenetic tree to have its own evolutionary rate<sup>81</sup>. Runs were performed  
348 in triplicates, each consisting of MCMC chains of 400 million iterations, with a 25%

349 burn-in. Parameter values were sampled every 10,000 generations. The effective sample  
350 size (ESS) values were confirmed to be higher than 200 for all parameters using Tracer  
351 v.1.7<sup>82</sup>. The time of the most recent common ancestor (MRCA) and 95% highest posterior  
352 densities (95% HPDs) were inferred from the nodes of the maximum clade credibility  
353 tree. To assess the significance of the temporal signatures observed, 10 randomized tip  
354 date datasets run under the same parameters were used as controls<sup>83</sup>. To assess the  
355 robustness of the population size inference to changes in the dataset, a second non-  
356 overlapping subset of 200 genomes obtained from the same representative subset of 422  
357 isolates was analyzed using BEAST with the same parameters as described above.  
358 Estimations of the effective population size along the years were computed using Tracer  
359 v.1.7<sup>82</sup>.

360 Phylogeography analyses were then extended to the 1972 CC1 genomes for which  
361 country and year of isolation were available. Time-calibrated phylogenies were inferred  
362 from the maximum likelihood core genome trees (obtained with IQ-tree, as described  
363 above) using either Bactdating v1.0.1<sup>84</sup>, Treetime v0.5.2<sup>85</sup> or Treedater v0.3.0<sup>35</sup>, assuming  
364 a relaxed clock model and the estimated substitution rate of  $1.954 \times 10^{-7} \pm 2.0152 \times 10^{-8}$   
365 substitutions/site/year (obtained with BEAST as described above). Cophenetic  
366 correlations between BEAST and the three alternative large-scale dating methods were  
367 evaluated and better  $R^2$  coefficient scores were obtained for Treedater (Supplementary  
368 Figure S7). For this reason, the latter dated tree was used in further downstream analyses.  
369 Ancestral geographic reconstruction was performed with PastML<sup>36</sup> using the MPPA  
370 method with an F81-like model and estimated ancestral state probabilities were mapped  
371 onto the full time-calibrated phylogeny using the R package ape v5.3<sup>86</sup>.

372

373 **SL1 global transmission dynamics.** To infer the transmission dynamics at a recent time  
374 scale (Figure 4a and supplementary Figure S12), we focused on the CC1 main sublineage,  
375 and we analyzed the genetic similarity of SL1 isolates from 2010-2018 ( $n=1,266$ ) across  
376 different temporal and spatial scales, as described before<sup>87</sup>. To avoid oversampling  
377 isolates from outbreak investigations, we excluded all non-clinical isolates from  
378 confirmed outbreaks ( $n=91$  isolates from 19 outbreaks). We computed the probability  $P_1$   
379 that a pair of isolates that satisfy a given location criteria that were sampled within two  
380 years of each other had a MRCA in a specific range (0-5 years, 5-20 years, 20-50 years,  
381 >50 years), relative to the probability  $P_{ref}$  that a pair isolates), sampled within two years  
382 of each other, had an MRCA within that particular range. The location criteria used were:  
383 i) within countries (both isolates come from the same country); ii) between countries  
384  $\leq 1000$  km (isolates come from distinct countries, separated by less than 1000 km, from  
385 the same continent); iii) between countries  $>1000$ km (isolates come from distinct  
386 countries, separated by more than 1000 km, from the same continent; used as reference);  
387 and iv) between continents (isolates come from distinct continents). Spatial relationships  
388 between isolates were calculated using the centroid coordinates of the countries or regions  
389 of origin.

390 We estimated these probabilities using:

$$P_1 = \frac{\# \text{ pairs \{MRCA} \in \text{ window \& sampled within 2 years \& given location criteria\}}}{\# \text{ pairs\{sampled within 2 years \& given location criteria\}}}$$

$$P_{ref} = \frac{\# \text{ pairs\{MRCA} \in \text{ window \& sampled within 2 years \& distant countries\}}}{\# \text{ pairs\{sampled within 2 years \& distant countries\}}}$$

391 Finally, the relative risk (RR) was given by:

$$RR = \frac{P_1}{P_{ref}}$$

392 To measure uncertainty, we used a combination of bootstrapping observations and  
393 sampling trees from the Treedater v0.3.0 package<sup>35</sup> to incorporate both sampling and tree



394 uncertainty. Over repeated resamples, we first selected a random tree and calculate the  
395 evolutionary distance separating all pairs of sequences. Then, we resampled all the  
396 isolates with replacement and recalculate RR each time. The 95% confidence intervals are  
397 the 2.5% and 97.5% quantiles from the resultant distribution from 1000 resampling  
398 events.

399

400 **SL1 local transmission dynamics.** To assess the SL1 local transmission dynamics, we  
401 used available data from France. We computed the proportion of closely related pairs of  
402 French isolates (defined as having a MRCA<5years) as a function of the spatial distance  
403 within and between administrative Departments (**Figure 4b**):

$$p(location) = \frac{\# \text{ pairs } \{ \text{MRCA} < 5 \text{ years \& sampled within 2 years \& given location} \}}{\# \text{ pairs} \{ \text{sampled within 2 years \& given location} \}}$$

404 The different location criteria used are: i) within Department: both isolates come from the  
405 same Department; ii) between Departments: isolates come from different Departments,  
406 separated by a distance from 50 to >500km. The French Departments are shown in the  
407 map in **Figure S11**.

408 As shown in Salje et al.<sup>87</sup>, the reciprocal of  $p(\textit{within department})$  represents the lower  
409 limit of the number of sources of human infection circulating within a Department.

410 To assess uncertainty, we used the bootstrapping approach as described above.

411 To explore possible differences between Departments, we computed the relative risk that  
412 a pair of isolates share a MRCA of less than 5 years when both come from the same  
413 department compared to when coming from different departments. We looked at 2  
414 different groups of departments: i) Paris alone (**Figure 4c, left**): within Paris (both  
415 isolates come from Paris) and between Paris and other departments (for each pair of  
416 isolates, one of them come from Paris, and the other one from another department); ii)  
417 other departments, except Paris (**Figure 4c, right**): with other departments (both isolates

418 come from the same department, excluding Paris) and between all other departments  
419 (isolates come from 2 different departments, excluding Paris). For each group, to compute  
420 the relative risk  $RR$ , we used the same approach as explained above. We estimated:

$$P_1 = \frac{\# \text{ pairs \{MRCA < 5 years \& sampled within 2 years \& same department\}}}{\# \text{ pairs\{sampled within 2 years \& same department\}}}$$
$$P_{\text{ref}} = \frac{\# \text{ pairs\{MRCA < 5 years \& sampled within 2 years \& different departments\}}}{\# \text{ pairs\{sampled within 2 years \& different departments\}}}$$

421 Finally, the relative risk is given by:

$$RR = \frac{P_1}{P_{\text{ref}}}$$

422 To determine uncertainty, we used the same bootstrapping approach as described above.  
423 To assess the statistical significance of each  $RR$ , we performed a one-tailed test. We set  
424 the null hypothesis ( $H_0$ ) as  $RR \leq 1$ , and alternative hypothesis ( $H_1$ ) as  $RR > 1$ . For each  
425 group, composed  $N$  bootstrap events, we computed:

$$p = \frac{\sum_{i=1}^N I(RR_i \leq 1)}{N}$$

426

427 **Data availability.** All sequence data will be made available in NCBI-SRA and EBI-ENA  
428 public archives upon acceptance.

429

## 430 **Acknowledgements**

431           The findings and conclusions in this report are those of the authors and do not  
432 necessarily represent the official position of the Centers for Disease Control and  
433 Prevention. The authors thank all participating laboratories and the PulseNet International  
434 Network members for their contributions. The authors are also grateful to Martin  
435 Wiedmann, Mark Achtman and Jana Haase for providing cultures of historical isolates, to  
436 Thomas Cantinelli and Laure Diancourt for contributions to the initial sequencing of CC1  
437 isolates, to Keith Jolley, Youssef Ghorbal and Bryan Brancotte for BIGSdb-*Listeria*  
438 maintenance and software updates, to Eduardo Rocha, Etienne Simon-Lorière, Anna  
439 Zhukova, Sophie Creno, Eric Deveaud, Guy Bayle and Erik Volz for insightful feedback  
440 on methodological issues, and François-Xavier Weill for critical reading. This work used  
441 the computational and storage services (TARS cluster) provided by the IT department at  
442 Institut Pasteur, Paris.

443

## 444 **Funding**

445           This study was supported financially by Institut Pasteur, Inserm, Santé Publique  
446 France, the European Research Council, the Swiss National Science Foundation (Project  
447 SINERGIA, Grant No. CRSII3\_147692), the Investissement d’Avenir program  
448 Laboratoire d’Excellence ‘Integrative Biology of Emerging Infectious Diseases’ (grant  
449 ANR-10-LABX-62-IBEID), and the Advanced Molecular Detection (AMD) initiative at  
450 CDC. Marc Lecuit is a member of Institut Universitaire de France.

451

## 452 **Author contributions**

453           ML coordinated the project. ML and SB conceived and designed the study. AM,  
454 NL, TW, SC, HS analysed the data, together with SB and ML. AL, VB, BG, TJD, JF, EF,

455 EMN, JT, AP, BPH, CT, PGS, SB, ML and the *Listeria* CC1 study group obtained the  
456 isolates, acquired metadata data collection and genome sequences. AM, HS and ML  
457 wrote the manuscript. All authors commented and edited the final version of the  
458 manuscript.

## 459 References

- 460 1. Swaminathan, B. & Gerner-Smidt, P. The epidemiology of human listeriosis. *Microbes*  
461 *Infect.* **9**, 1236–1243 (2007).
- 462 2. Charlier, C. *et al.* Clinical features and prognostic factors of listeriosis: the MONALISA  
463 national prospective cohort study. *Lancet Infect. Dis.* **17**, 510–519 (2017).
- 464 3. Orsi, R. H., Bakker, H. C. de. & Wiedmann, M. *Listeria monocytogenes* lineages:  
465 genomics, evolution, ecology, and phenotypic characteristics. *Int. J. Med. Microbiol.* **301**,  
466 79–96 (2011).
- 467 4. Ragon, M. *et al.* A new perspective on *Listeria monocytogenes* evolution. *PLoS Pathog.* **4**,  
468 e1000146 (2008).
- 469 5. Cantinelli, T. *et al.* ‘Epidemic clones’ of *Listeria monocytogenes* are widespread and  
470 ancient clonal groups. *J. Clin. Microbiol.* **51**, 3770–3779 (2013).
- 471 6. Chenal-Francisque, V. *et al.* Worldwide distribution of major clones of *Listeria*  
472 *monocytogenes*. *Emerg. Infect. Dis.* **17**, 1110–1112 (2011).
- 473 7. Dumont, J. & Cotoni, L. Bacille semblable au bacielle du Rouget du porc rencontré dans le  
474 liquide céphalo-rachidien d’un méningitique. *Ann. Inst. Pasteur (Paris)*. **35**, 625–633  
475 (1921).
- 476 8. Hyden, P. *et al.* Draft genome sequence of a 94-year-old *Listeria monocytogenes* isolate,  
477 SLCC208. *Genome Announc.* **4**, e01572-15 (2016).
- 478 9. Maury, M. *et al.* Uncovering *Listeria monocytogenes* hypervirulence by harnessing its  
479 biodiversity. *Nat. Genet.* **48**, 308–313 (2016).
- 480 10. Kwong, J. C. *et al.* Prospective whole genome sequencing enhances national surveillance  
481 of *Listeria monocytogenes*. *J. Clin. Microbiol.* **54**, JCM.02344-15 (2015).
- 482 11. Bertrand, S. *et al.* Diversity of *Listeria monocytogenes* strains of clinical and food chain  
483 origins in Belgium between 1985 and 2014. *PLoS One* **11**, e0164283 (2016).
- 484 12. Toledo, V. *et al.* Genomic diversity of *Listeria monocytogenes* isolated from clinical and  
485 non-clinical samples in Chile. *Genes (Basel)*. **9**, 396 (2018).
- 486 13. Hilliard, A. *et al.* Genomic characterization of *Listeria monocytogenes* isolates associated  
487 with clinical listeriosis and the food production environment in Ireland. *Genes (Basel)*. **9**,  
488 171 (2018).
- 489 14. Scaltriti, E. *et al.* Population Structure of *Listeria monocytogenes* in Emilia-Romagna  
490 (Italy) and implications on whole genome sequencing surveillance of listeriosis. *Front.*  
491 *Public Heal.* **8**, (2020).
- 492 15. Schlech, W. F. *et al.* Epidemic listeriosis — evidence for transmission by food. *N. Engl. J.*  
493 *Med.* **308**, 203–206 (1983).
- 494 16. Maury, M. M. *et al.* Hypervirulent *Listeria monocytogenes* clones’ adaption to mammalian  
495 gut accounts for their association with dairy products. *Nat. Commun.* **10**, 2488 (2019).
- 496 17. Painset, A. *et al.* Liseq – Whole-genome sequencing of a cross-sectional survey of *Listeria*  
497 *monocytogenes* in ready-to-eat foods and human clinical cases in Europe. *Microb.*  
498 *Genomics* **5**, e000257 (2019).
- 499 18. Félix, B. *et al.* Population genetic structure of *Listeria monocytogenes* strains isolated from  
500 the pig and pork production chain in France. *Front. Microbiol.* **9**, (2018).
- 501 19. Dalton, C. B. *et al.* An outbreak of gastroenteritis and fever due to *Listeria monocytogenes*  
502 in milk. *N. Engl. J. Med.* **336**, 100–5 (1997).
- 503 20. Costard, S., Espejo, L., Groenendaal, H. & Zagmutt, F. J. Outbreak-related disease burden  
504 associated with consumption of unpasteurized cow’s milk and cheese, United States,  
505 2009–2014. *Emerg. Infect. Dis.* **23**, 957–964 (2017).
- 506 21. Filipello, V. *et al.* Attribution of *Listeria monocytogenes* human infections to food and  
507 animal sources in Northern Italy. *Food Microbiol.* **89**, (2020).
- 508 22. Dreyer, M. *et al.* *Listeria monocytogenes* sequence type 1 is predominant in ruminant  
509 rhombencephalitis. *Sci. Rep.* **6**, 36419 (2016).
- 510 23. Papić, B., Pate, M., Félix, B. & Kušar, D. Genetic diversity of *Listeria monocytogenes*  
511 strains in ruminant abortion and rhombencephalitis cases in comparison with the natural

- environment. *BMC Microbiol.* **19**, 299 (2019).
- 513 24. Garcia-Garcera, M. *et al.* *Listeria monocytogenes* faecal carriage is common and driven by  
514 microbiota. *bioRxiv* (2020).
- 515 25. Nightingale, K. K. *et al.* Ecology and transmission of *Listeria monocytogenes* infecting  
516 ruminants and in the farm environment. *Appl. Environ. Microbiol.* **70**, 4458–4467 (2004).
- 517 26. Esteban, J. I., Oporto, B., Aduriz, G., Juste, R. A. & Hurtado, A. Faecal shedding and  
518 strain diversity of *Listeria monocytogenes* in healthy ruminants and swine in Northern  
519 Spain. *BMC Vet. Res.* **5**, (2009).
- 520 27. Lyautey, E. *et al.* Characteristics and frequency of detection of fecal *Listeria*  
521 *monocytogenes* shed by livestock, wildlife, and humans. *Can. J. Microbiol.* **53**, 1158–1167  
522 (2007).
- 523 28. Borucki, M. K. *et al.* Genetic diversity of *Listeria monocytogenes* strains from a high-  
524 prevalence dairy farm. *Appl. Environ. Microbiol.* **71**, 5893–5899 (2005).
- 525 29. Jiang, X., Islam, M., Morgan, J. & Doyle, M. P. Fate of *Listeria monocytogenes* in bovine  
526 manure - Amended soil. *J. Food Prot.* **67**, 1676–1681 (2004).
- 527 30. Moura, A. *et al.* Whole genome-based population biology and epidemiological  
528 surveillance of *Listeria monocytogenes*. *Nat. Microbiol.* **2**, 16185 (2016).
- 529 31. Kuenne, C. *et al.* Reassessment of the *Listeria monocytogenes* pan-genome reveals  
530 dynamic integration hotspots and mobile genetic elements as major components of the  
531 accessory genome. *BMC Genomics* **14**, 47 (2013).
- 532 32. Cotter, P. D. *et al.* Listeriolysin S, a novel peptide haemolysin associated with a subset of  
533 lineage I *Listeria monocytogenes*. *PLoS Pathog.* **4**, e1000144 (2008).
- 534 33. Lee, S., Ward, T. J., Jima, D. D., Parsons, C. & Kathariou, S. The arsenic  
535 resistance-associated *Listeria* genomic island LGI2 exhibits sequence and integration site  
536 diversity and a propensity for three *Listeria monocytogenes* clones with enhanced  
537 virulence. *Appl. Environ. Microbiol.* **83**, (2017).
- 538 34. Suchard, M. A. *et al.* Bayesian phylogenetic and phylodynamic data integration using  
539 BEAST 1.10. *Virus Evol.* **4**, vey016 (2018).
- 540 35. Volz, E. M. & Frost, S. D. W. Scalable relaxed clock phylogenetic dating. *Virus Evol.* **3**,  
541 1–9 (2017).
- 542 36. Ishikawa, S. A., Zhukova, A., Iwasaki, W. & Gascuel, O. A fast likelihood method to  
543 reconstruct and visualize ancestral scenarios. *Mol. Biol. Evol.* **36**, 2069–2085 (2019).
- 544 37. Bowling, G. A. The introduction of cattle into colonial North America. *J. Dairy Sci.* **25**,  
545 129–154 (1942).
- 546 38. Drummond, A. J., Rambaut, A., Shapiro, B. & Pybus, O. G. Bayesian coalescent inference  
547 of past population dynamics from molecular sequences. *Mol. Biol. Evol.* **22**, 1185–1192  
548 (2005).
- 549 39. Tajima, F. Statistical method for testing the neutral mutation hypothesis by DNA  
550 polymorphism. *Genetics* **123**, 585–595 (1989).
- 551 40. World Trade Organization. *World trade report.* (World Trade Organization, 2013).
- 552 41. Zimmerman, W. D. Live cattle export trade between United States and Great Britain,  
553 1868-1885. *Agric. Hist.* **36**, 46–52 (1962).
- 554 42. Burroughs, W. J. & World Meteorological Organization. *Climate: into the 21st century.*  
555 (Cambridge University Press, 2003).
- 556 43. Groombridge, B. *Global Biodiversity: status of the Earth's living resources.* (Springer  
557 Netherlands, 1992).
- 558 44. Franz, E. *et al.* Phylogeographic analysis reveals multiple international transmission events  
559 have driven the global emergence of *Escherichia coli* O157:H7. *Clin. Infect. Dis.* **69**, 428–  
560 437 (2019).
- 561 45. Mourkas, E. *et al.* Agricultural intensification and the evolution of host specialism in the  
562 enteric pathogen *Campylobacter jejuni*. *Proc. Natl. Acad. Sci.* **117**, 11018–11028 (2020).
- 563 46. LeBlanc, S. J., Lissemore, K. D., Kelton, D. F., Duffield, T. F. & Leslie, K. E. Major  
564 advances in disease prevention in dairy cattle. *J. Dairy Sci.* **89**, 1267–1279 (2006).
- 565 47. Cartwright, E. J. *et al.* Listeriosis outbreaks and associated food vehicles, United States,  
566 1998-2008. *Emerg. Infect. Dis.* **19**, 1–9 (2013).

- 567 48. De Valk, H. *et al.* Two consecutive nationwide outbreaks of listeriosis in France, October  
568 1999-February 2000. *Am. J. Epidemiol.* **154**, 944–950 (2001).
- 569 49. Goulet, V. *et al.* Effect of prevention measures on incidence of human listeriosis, France,  
570 1987-1997. *Emerg. Infect. Dis.* **7**, 983–989 (2001).
- 571 50. Tappero, J. W., Schuchat, A., Deaver, K. A., Mascola, L. & Wenger, J. D. Reduction in  
572 the incidence of human listeriosis in the United States. Effectiveness of prevention efforts?  
573 *JAMA* **273**, 1118–22 (1995).
- 574 51. Kathariou, S. Foodborne outbreaks of listeriosis and epidemic-associated lineages of  
575 *Listeria monocytogenes*. in *Microbial Food Safety in Animal Agriculture* 243–256  
576 (Blackwell Publishing, 2008). doi:10.1002/9780470752616.ch25
- 577 52. Maury, M. M. *et al.* Spontaneous loss of virulence in natural populations of *Listeria*  
578 *monocytogenes*. *Infect. Immun.* **85**, 1–13 (2017).
- 579 53. Castro, H., Jaakkonen, A., Hakkinen, M., Korkeala, H. & Lindström, M. Occurrence,  
580 persistence, and contamination routes of *Listeria monocytogenes* genotypes on three  
581 Finnish dairy cattle farms: A longitudinal study. *Appl. Environ. Microbiol.* **84**, (2018).
- 582 54. Moura, A. *et al.* Real-time whole-genome sequencing for surveillance of *Listeria*  
583 *monocytogenes*, France. *Emerg. Infect. Dis.* **23**, 1462–1470 (2017).
- 584 55. Criscuolo, A. & Brisse, S. AlienTrimmer: A tool to quickly and accurately trim off  
585 multiple short contaminant sequences from high-throughput sequencing reads. *Genomics*  
586 **102**, 500–506 (2013).
- 587 56. Liu, Y., Schröder, J. & Schmidt, B. Musket: A multistage k-mer spectrum-based error  
588 corrector for Illumina sequence data. *Bioinformatics* **29**, 308–315 (2013).
- 589 57. Andrews, S. FastQC: a quality control tool for high throughput sequence data. Available  
590 online at: <http://www.bioinformatics.babraham.ac.uk/projects/fastqc> (2010).
- 591 58. Bankevich, A. *et al.* SPAdes: a new genome assembly algorithm and its applications to  
592 single-cell sequencing. *J. Comput. Biol.* **19**, 455–477 (2012).
- 593 59. Seemann, T. Prokka: Rapid prokaryotic genome annotation. *Bioinformatics* **30**, 2068–2069  
594 (2014).
- 595 60. Huerta-Cepas, J. *et al.* Fast genome-wide functional annotation through orthology  
596 assignment by eggNOG-mapper. *Mol. Biol. Evol.* **34**, 2115–2122 (2017).
- 597 61. Buchfink, B., Xie, C. & Huson, D. H. Fast and sensitive protein alignment using  
598 DIAMOND. *Nature Methods* **12**, 59–60 (2014).
- 599 62. Robertson, J. & Nash, J. H. E. MOB-suite: software tools for clustering, reconstruction  
600 and typing of plasmids from draft assemblies. *Microb. genomics* **4**, (2018).
- 601 63. Arndt, D. *et al.* PHASTER: a better, faster version of the PHAST phage search tool.  
602 *Nucleic Acids Res.* **44**, W16--W21 (2016).
- 603 64. Jolley, K. A. & Maiden, M. C. J. BIGSdb: Scalable analysis of bacterial genome variation  
604 at the population level. *BMC Bioinformatics* **11**, 595 (2010).
- 605 65. Page, A. J. *et al.* Roary: Rapid large-scale prokaryote pan genome analysis. *Bioinformatics*  
606 **31**, 3691–3693 (2015).
- 607 66. Collins, C. & Didelot, X. A phylogenetic method to perform genome-wide association  
608 studies in microbes that accounts for population structure and recombination. *PLoS*  
609 *Comput. Biol.* **14**, e1005958 (2018).
- 610 67. Doumith, M., Buchrieser, C., Glaser, P., Jacquet, C. & Martin, P. Differentiation of the  
611 major *Listeria monocytogenes* serovars by multiplex PCR. *J. Clin. Microbiol.* **42**, 3819–  
612 3822 (2004).
- 613 68. Dixon, P. VEGAN, a package of R functions for community ecology. *J. Veg. Sci.* **14**, 927–  
614 930 (2003).
- 615 69. Edgar, R. C. MUSCLE: Multiple sequence alignment with high accuracy and high  
616 throughput. *Nucleic Acids Res.* **32**, 113 (2004).
- 617 70. Mascola, L. *et al.* Listeriosis: an uncommon opportunistic infection in patients with  
618 acquired immunodeficiency syndrome. A report of five cases and a review of the  
619 literature. *Am. J. Med.* **84**, 162–164 (1988).
- 620 71. Croucher, N. J. *et al.* Rapid phylogenetic analysis of large samples of recombinant  
621 bacterial whole genome sequences using Gubbins. *Nucleic Acids Res.* **43**, e15 (2015).

- 622 72. Nguyen, L. T., Schmidt, H. A., Von Haeseler, A. & Minh, B. Q. IQ-TREE: A fast and  
623 effective stochastic algorithm for estimating maximum-likelihood phylogenies. *Mol. Biol.*  
624 *Evol.* **32**, 268–274 (2015).
- 625 73. Tavaré, S. Some probabilistic and statistical problems in the analysis of DNA sequences.  
626 *American Mathematical Society: Lectures on Mathematics in the Life Sciences* (1986).  
627 doi:citeulike-article-id:4801403
- 628 74. Kalyaanamoorthy, S., Minh, B. Q., Wong, T. K. F., Von Haeseler, A. & Jermin, L. S.  
629 ModelFinder: Fast model selection for accurate phylogenetic estimates. *Nat. Methods* **14**,  
630 587–589 (2017).
- 631 75. Minh, B. Q., Nguyen, M. A. T. & von Haeseler, A. Ultrafast approximation for  
632 phylogenetic bootstrap. *Mol. Biol. Evol.* **30**, 1188–1195 (2013).
- 633 76. Yu, G., Smith, D. K., Zhu, H., Guan, Y. & Lam, T. T.-Y. ggtree: an r package for  
634 visualization and annotation of phylogenetic trees with their covariates and other  
635 associated data. *Methods Ecol. Evol.* **8**, 28–36 (2017).
- 636 77. Letunic, I. & Bork, P. Interactive tree of life (iTOL) v3: an online tool for the display and  
637 annotation of phylogenetic and other trees. *Nucleic Acids Res.* **44**, W242–245 (2016).
- 638 78. Page, A. J. *et al.* SNP-sites: rapid efficient extraction of SNPs from multi-FASTA  
639 alignments. *Microb. genomics* **2**, e000056 (2016).
- 640 79. Pfeifer, B., Wittelsbürger, U., Ramos-Onsins, S. E. & Lercher, M. J. PopGenome: an  
641 efficient Swiss army knife for population genomic analyses in R. *Mol. Biol. Evol.* **31**,  
642 1929–1936 (2014).
- 643 80. Rambaut, A., Lam, T. T., Max Carvalho, L. & Pybus, O. G. Exploring the temporal  
644 structure of heterochronous sequences using TempEst (formerly Path-O-Gen). *Virus Evol.*  
645 **2**, (2016).
- 646 81. Drummond, A. J., Ho, S. Y. W., Phillips, M. J. & Rambaut, A. Relaxed phylogenetics and  
647 dating with confidence. *PLoS Biol.* **4**, e88 (2006).
- 648 82. Rambaut, A., Drummond, A. J., Xie, D., Baele, G. & Suchard, M. A. Posterior  
649 summarization in Bayesian phylogenetics using Tracer 1.7. *Syst. Biol.* **67**, 901–904 (2018).
- 650 83. Firth, C. *et al.* Using time-structured data to estimate evolutionary rates of double-stranded  
651 DNA viruses. *Mol. Biol. Evol.* **27**, 2038–51 (2010).
- 652 84. Didelot, X., Croucher, N. J., Bentley, S. D., Harris, S. R. & Wilson, D. J. Bayesian  
653 inference of ancestral dates on bacterial phylogenetic trees. *Nucleic Acids Res.* **46**, e134  
654 (2018).
- 655 85. Himmelmann, L. & Metzler, D. TreeTime: an extensible C++ software package for  
656 Bayesian phylogeny reconstruction with time-calibration. *Bioinformatics* **25**, 2440–1  
657 (2009).
- 658 86. Paradis, E. & Schliep, K. ape 5.0: an environment for modern phylogenetics and  
659 evolutionary analyses in R. *Bioinformatics* **35**, 526–528 (2019).
- 660 87. Salje, H. *et al.* Dengue diversity across spatial and temporal scales: Local structure and the  
661 effect of host population size. *Science (80-. )*. **355**, 1302–1306 (2017).
- 662



## 663 Figure legends

### 664 **Figure 1. Geographical and temporal distribution of the isolates used in this study (N=2,021)** 665 **and phylogenetic analyses**

666 **a.** Geographical distribution and source distribution. Sampled countries are colored in blue, with  
667 hue gradient according to the number of isolates. Pie charts are proportional to the number of  
668 isolates sampled in each continent and represent the repartition of sample source types, using the  
669 source color key indicated in panel d. Out of 2,021 genomes, 8 isolates had unknown sampling  
670 location and are not shown in the map. **b.** Temporal distribution of isolates collected in this study.  
671 Darker blue bars indicate the period for which exhaustive clinical sampling was obtained for 7  
672 countries spanning 3 continents (2012-2017; US, FR, UK, DK, NL, AU, NZ). **c.** Unrooted  
673 maximum-likelihood phylogenetic tree of 2,021 *Lm*-CC1 genomes. The tree was generated from  
674 analysis (GTR+F+G4 model, 1000 ultra-fast bootstraps) of a 1.29 Mb recombination-purged core  
675 genome alignment. **d.** Midpoint rooted maximum-likelihood phylogenetic tree of 2,002 SL1  
676 genomes based on a recombination-purged core genome alignment of 1.29 Mb. The four external  
677 rings indicate the world region, year, type of infection and source type, respectively. The two  
678 inner rings indicate ST1 isolates and the 8 SL1 genetic clades identified in this study,  
679 respectively. **e.** Percentage of genomes per phylogroup and world region. Partitions are colored by  
680 world regions (left) and phylogroups (right), using the same color code as in panel d.

681

### 682 **Figure 2. Bayesian temporal and demographic analyses on a representative 200 isolate** 683 **dataset**

684 **a.** Bayesian skyline plot (BSP) with the estimation of *Lm*-CC1 effective population size ( $N_e$ ). The  
685 y-axis refers to the predicted number of individuals (log scale) and the x-axis to the timescale (in  
686 years). The median population size is marked in blue with its 95% high posterior density (HDP)  
687 in gray. Blue vertical panels delimitate the three globalization ages (1870-1914, 1944-1971, 1989-  
688 present). **b.** Bayesian time-calibrated tree. Nodes represent the estimated mean divergence times  
689 and gray bars represent the 95% HPD confidence intervals of node age. Scale indicates time (in  
690 years). Terminal branches and tips are colored by continents, as indicated in the key panel.

691

### 692 **Figure 3. Phylogeography of sublineage SL1**

693 **a.** Time-calibrated phylogeny based on the 1956 SL1 genomes. Pies at the nodes represent the  
694 probability of ancestral geographical locations, estimate using PastML using the MPPA method  
695 with an F81-like model. **b.** Inferred spread of SL1 populations across continents. The first  
696 introductions of each phylogroup are represented by arrows from their estimated world region  
697 origin. **c.** Proportion of inter-continental transitions per 10-year bins, normalized by the total  
698 number of phylogenetic branches per bin.

699

### 700 **Figure 4. Transmission dynamics of sublineage SL1**

701 **a.** Each point summarizes the relative risk that a pair of isolates has a MRCA within a defined  
702 timeframe and between different spatial scales: within the same country (within the same  
703 continent or within different continents), relative to the risk that a pair of isolates from countries  
704 separated by >1000km have a MRCA in the same range (set as the reference value, 'ref'). Error  
705 bars represent the 95% confidence intervals, based on 100 bootstrap time-calibrated trees. **b.**  
706 Proportion of pairs of isolates within the same country (France) sharing a MRCA of 5 or less  
707 years in function of the spatial distance within and between administrative departments (shown in  
708 the map). The green line indicates the mean proportion of genetically close strains regardless the  
709 geographical location. **c.** Left: relative risk for a pair of isolates to share a MRCA of 5 or less  
710 years when both are coming from Paris to when coming from another department (set as reference  
711 value) ( $p=0.43$ ). Right: relative risk for a pair of isolates to share a MRCA of 5 or less years  
712 when coming from the same department in France, except Paris, compared to when coming from  
713 different departments (set as reference value) ( $p<0.001$ , see Material and Methods for details).

**Figure 1****a**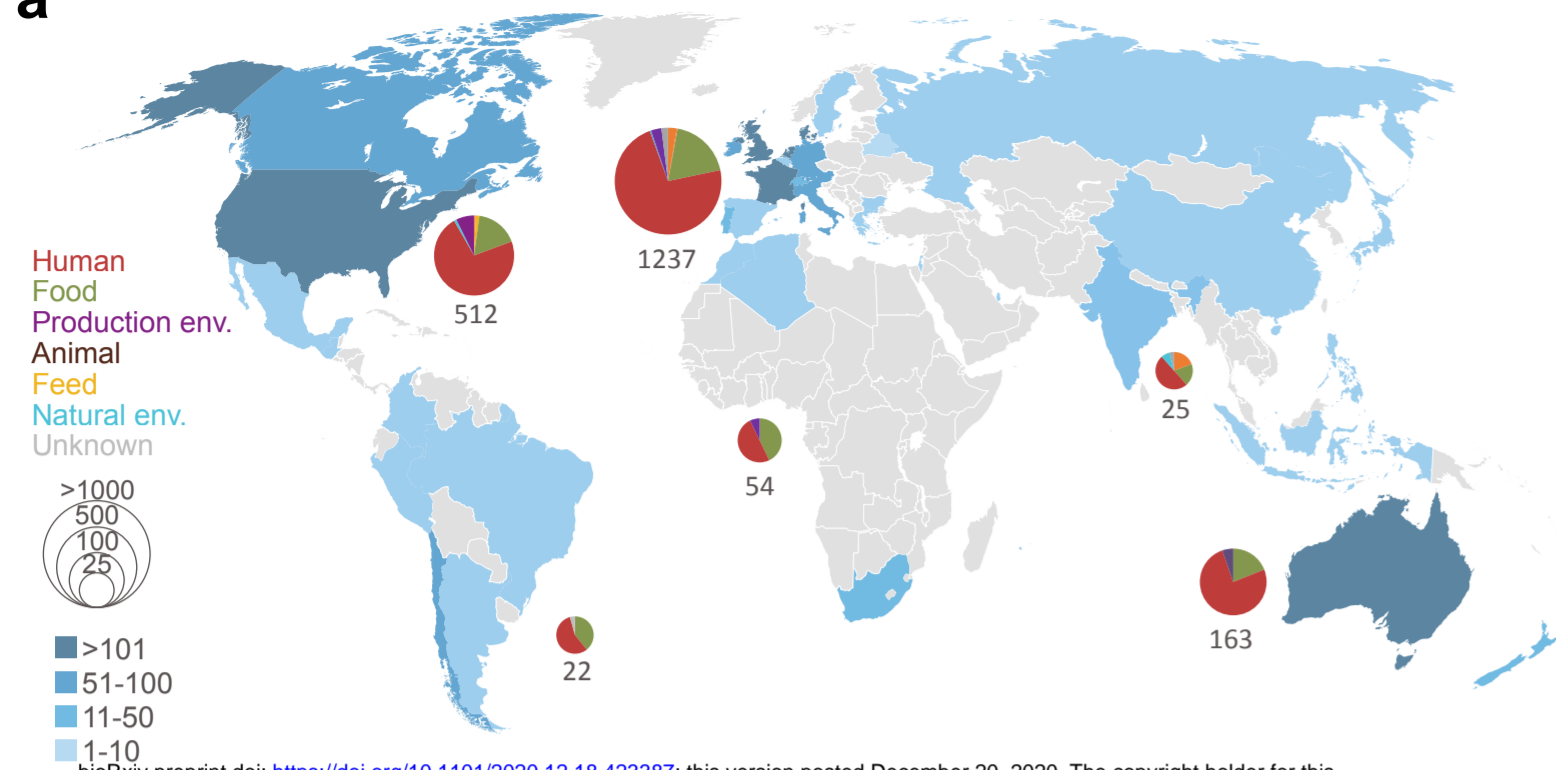

bioRxiv preprint doi: <https://doi.org/10.1101/2020.12.18.423387>; this version posted December 20, 2020. The copyright holder for this preprint (which was not certified by peer review) is the author/funder. All rights reserved. No reuse allowed without permission.

**b**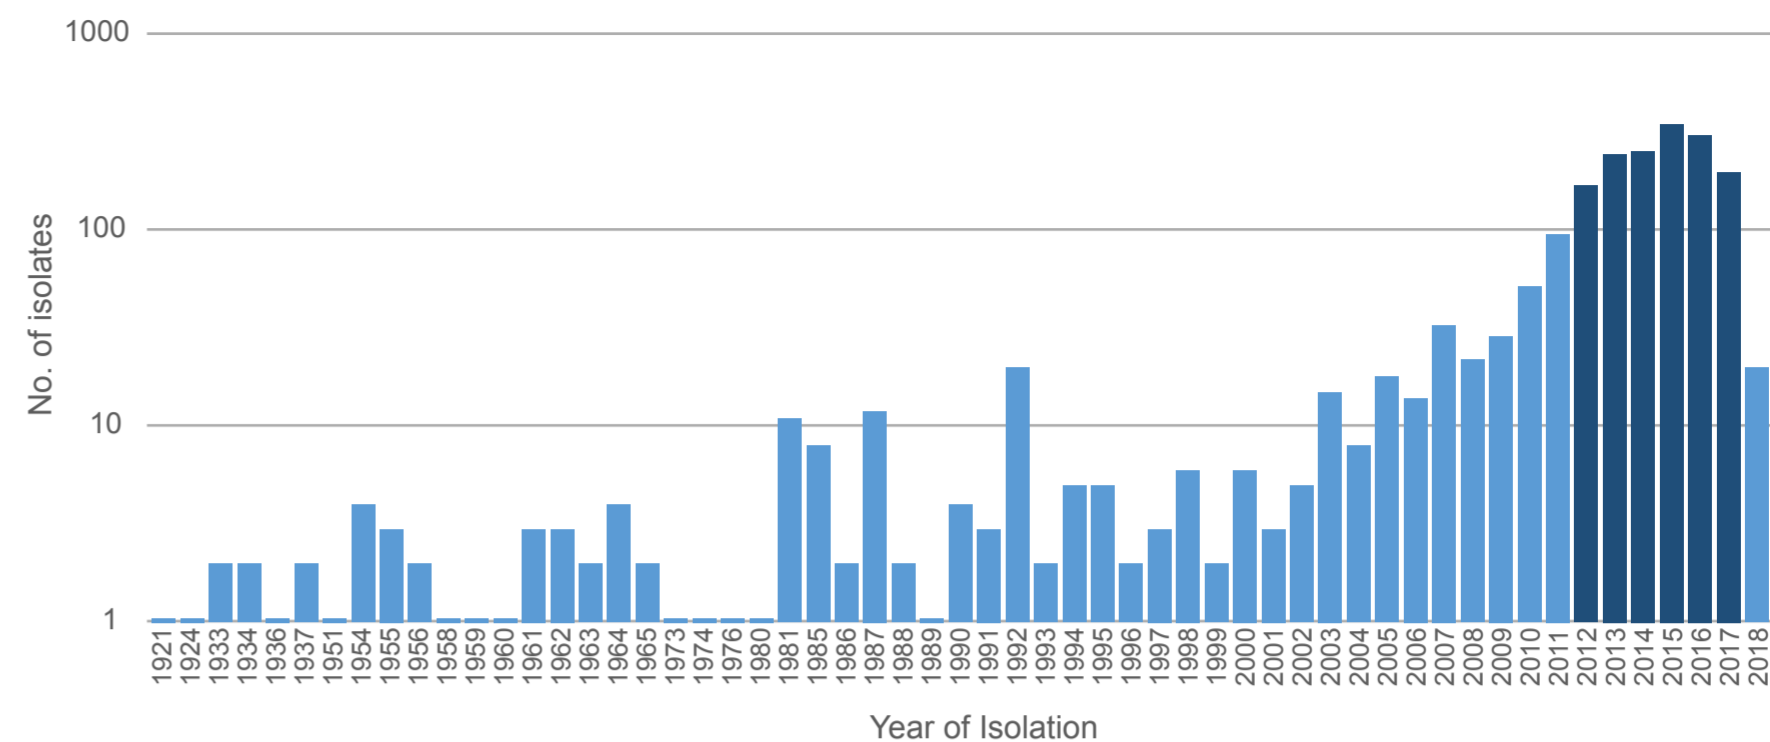**c**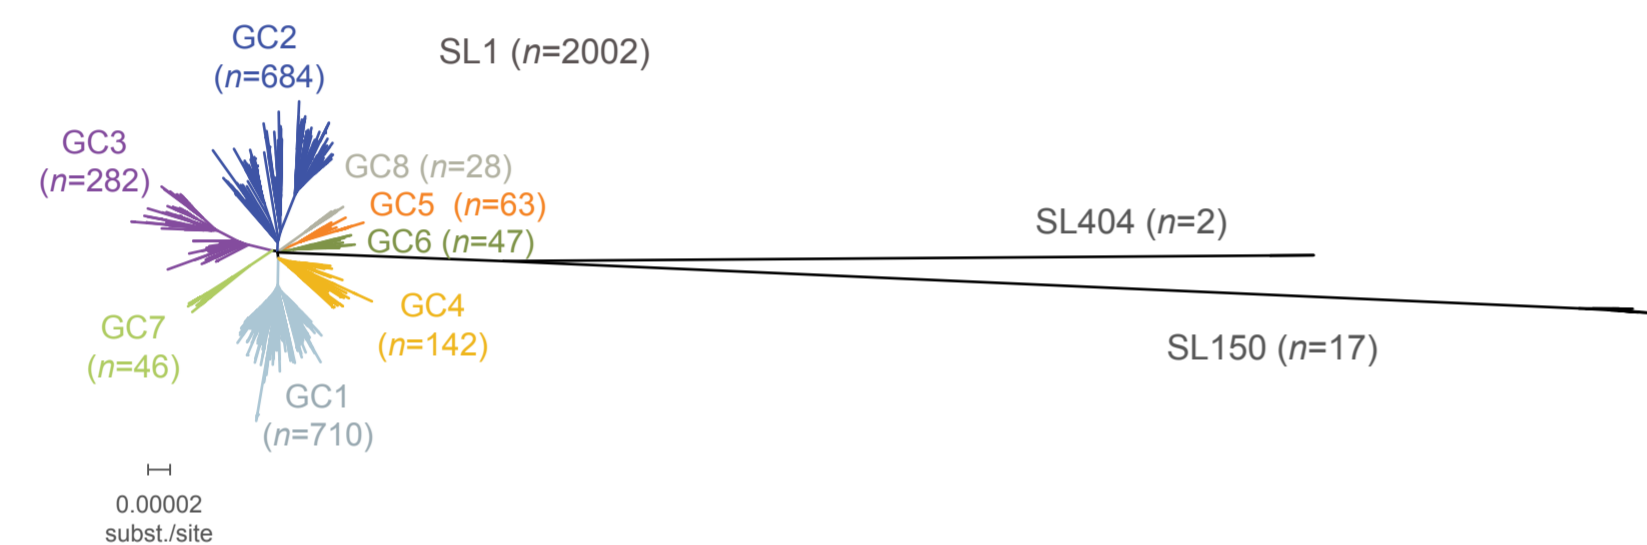**e**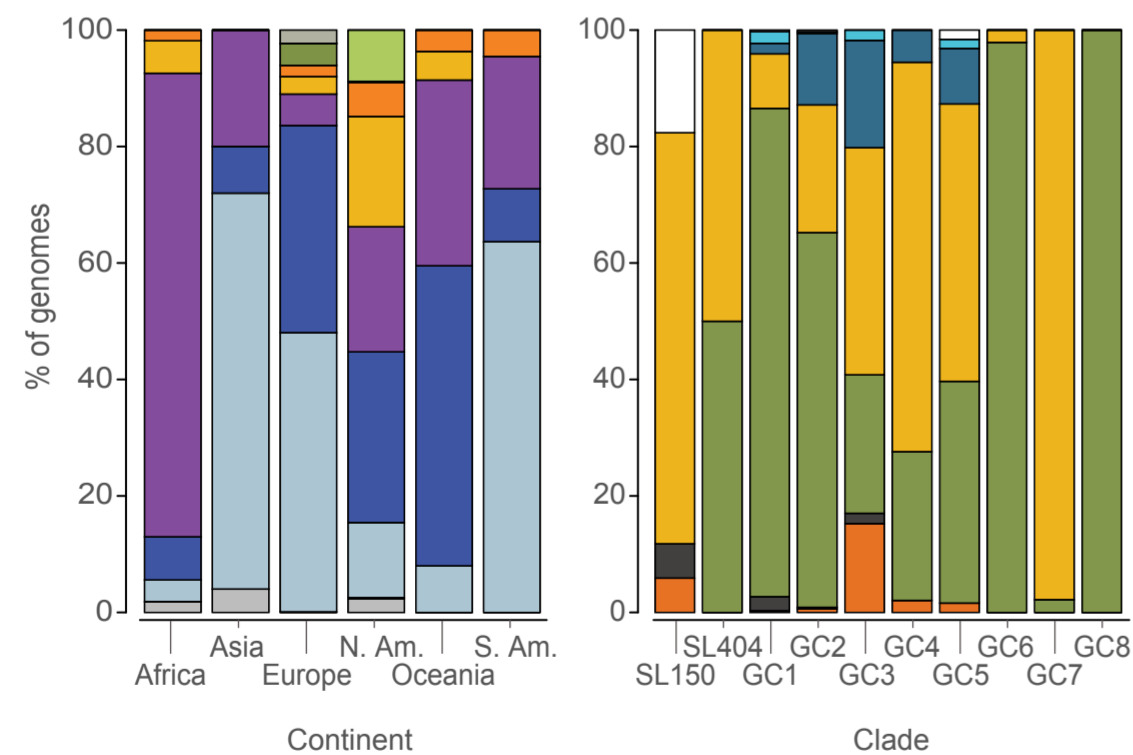**d**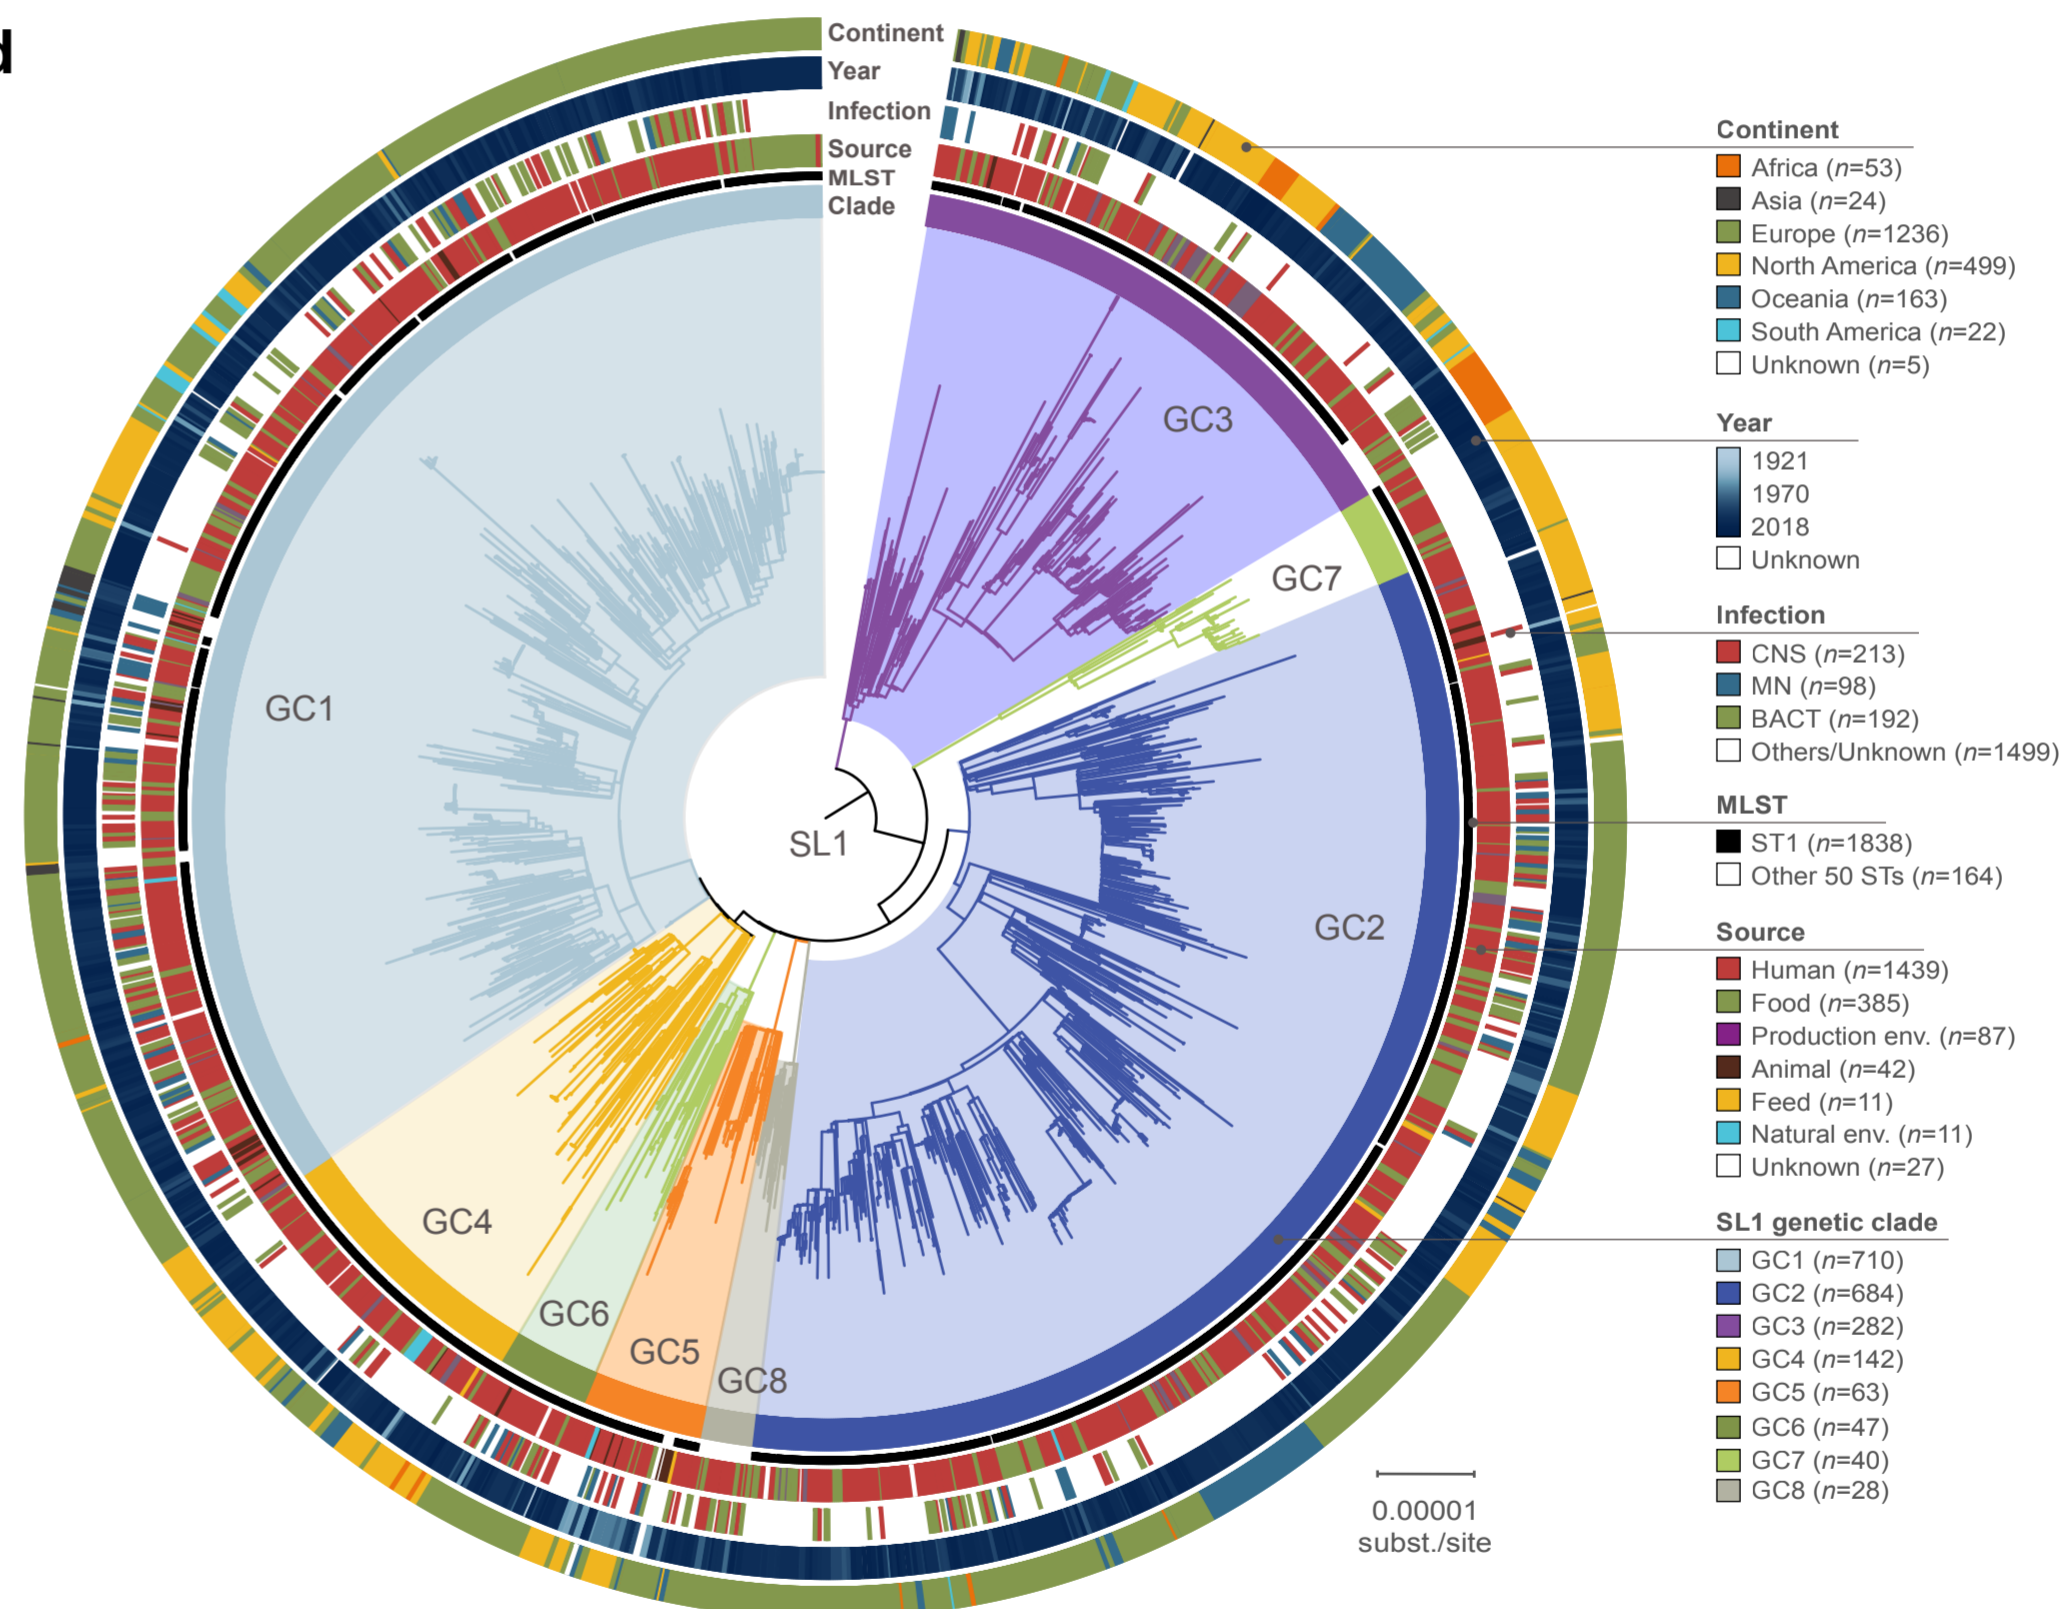**Figure 1. Geographical and temporal distribution of the isolates used in this study (N=2,021) and phylogenetic analyses**

**a.** Geographical distribution and source distribution. Sampled countries are colored in blue, with hue gradient according to the number of isolates. Pie charts are proportional to the number of isolates sampled in each continent and represent the repartition of sample source types, using the source color key indicated in panel d. Out of 2,021 genomes, 8 isolates had unknown sampling location and are not shown in the map.

**b.** Temporal distribution of isolates collected in this study. Darker blue bars indicate the period for which exhaustive clinical sampling was obtained for 7 countries spanning 3 continents (2012-2017; US, FR, UK, DK, NL, AU, NZ).

**c.** Unrooted maximum-likelihood phylogenetic tree of 2,021 *Lm*-CC1 genomes. The tree was generated from analysis (GTR+F+G4 model, 1000 ultra-fast bootstraps) of a 1.29 Mb recombination-purged core genome alignment.

**d.** Midpoint rooted maximum-likelihood phylogenetic tree of 2,002 SL1 genomes based on a recombination-purged core genome alignment of 1.29 Mb. The four external rings indicate the world region, year, type of infection and source type, respectively. The two inner rings indicate ST1 isolates and the 8 SL1 genetic clades identified in this study, respectively.

**e.** Percentage of genomes by world region (left) and phylogroup (right). Partitions are colored by world regions and phylogroup, using the same color code as in panel d.

**Figure 2**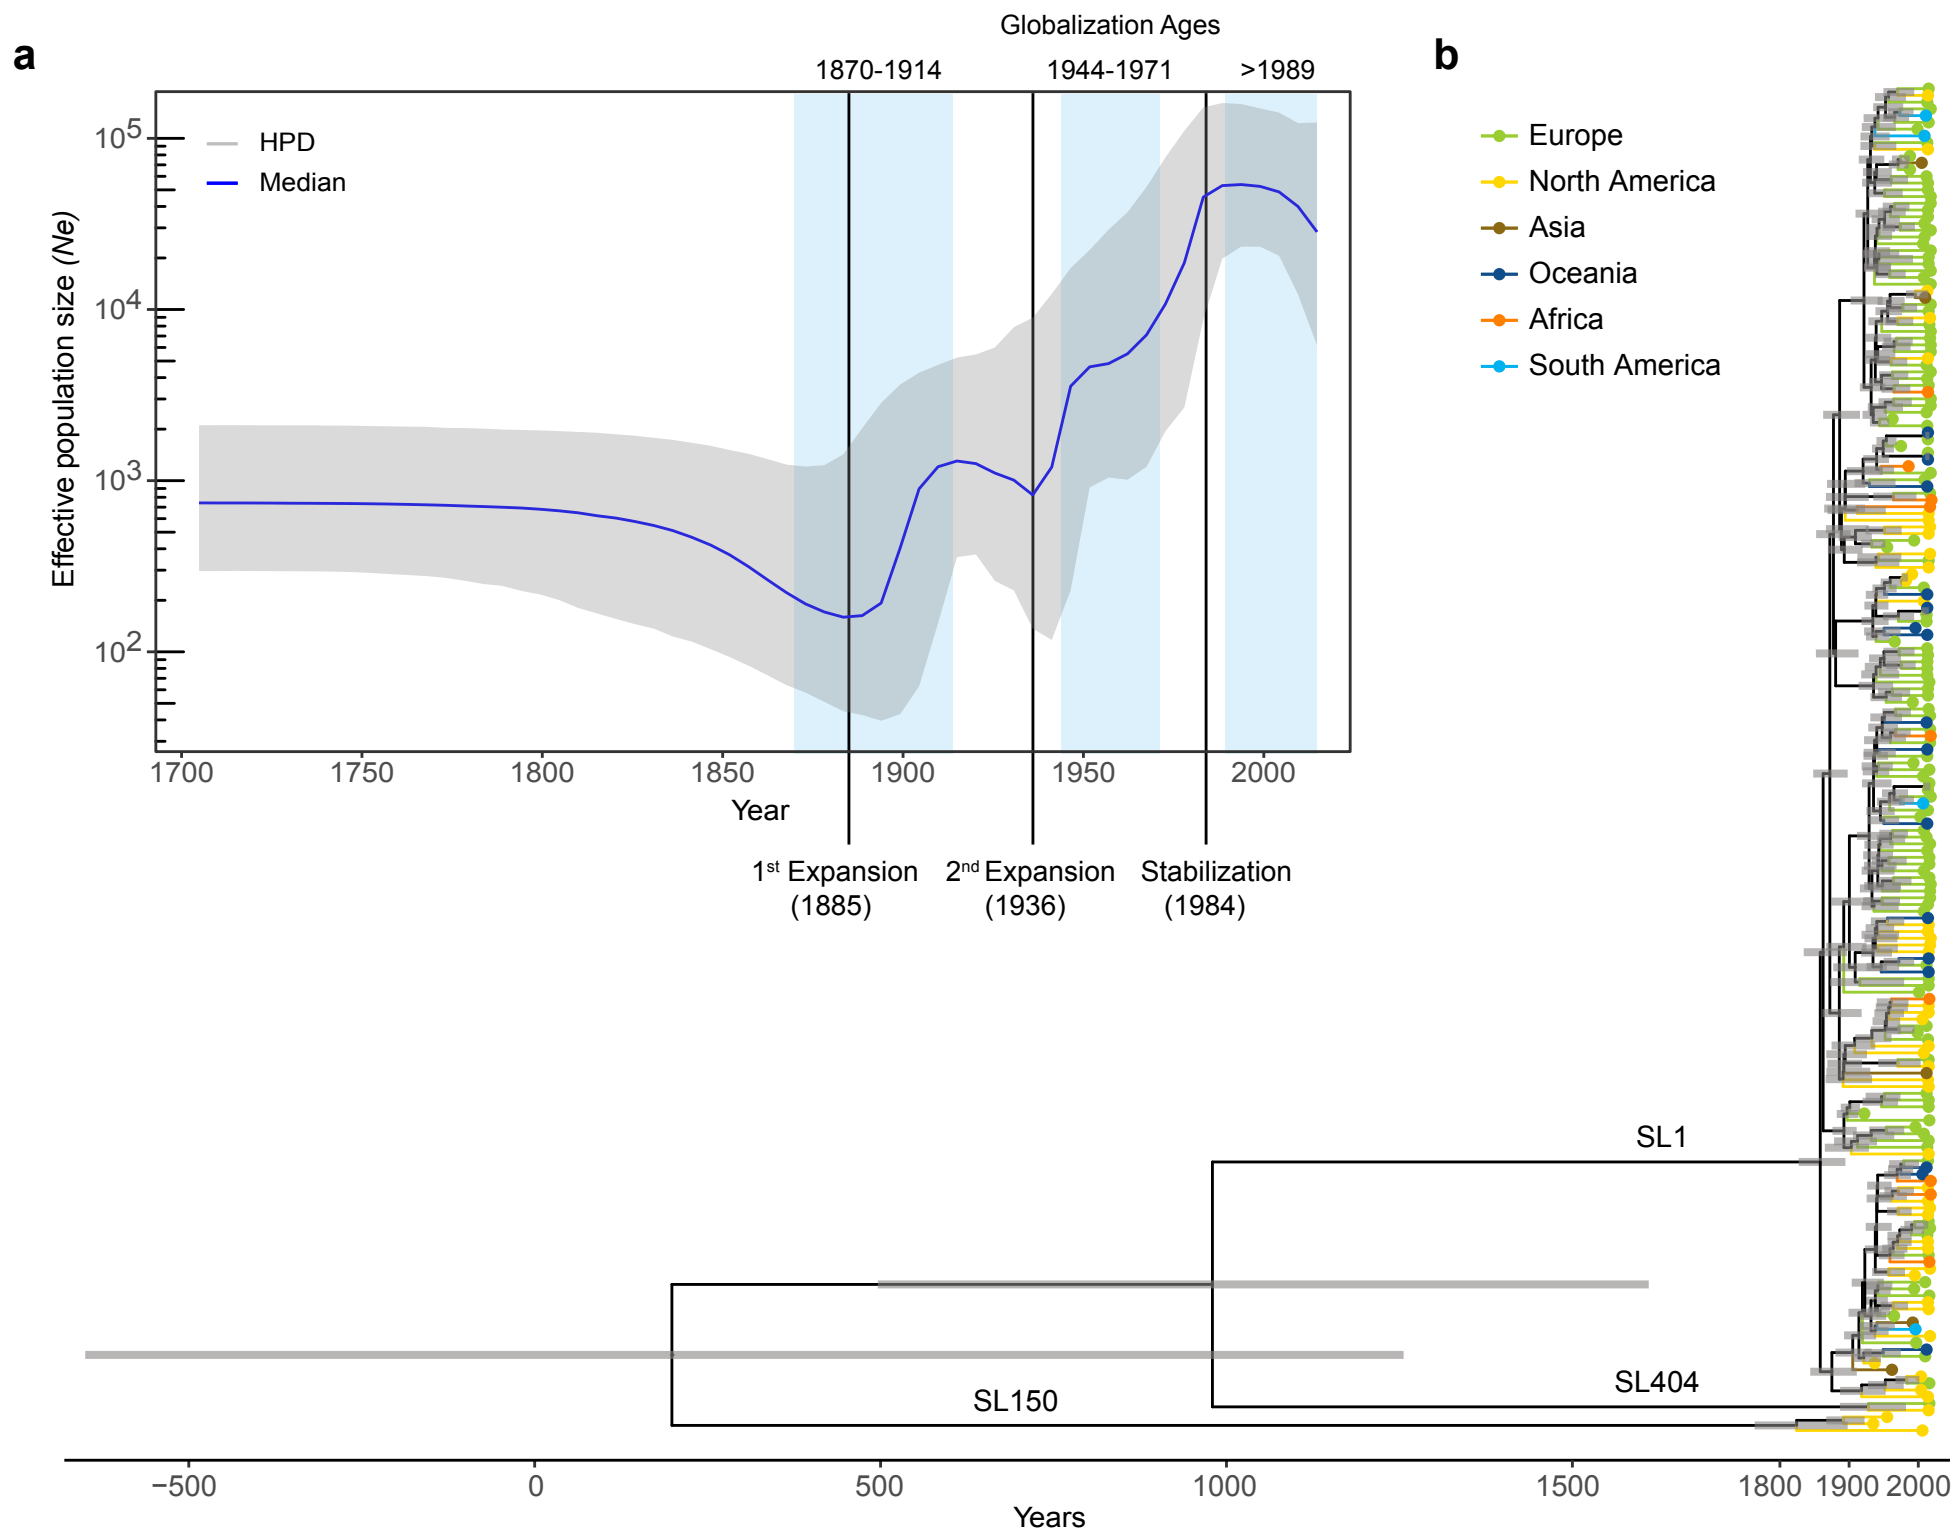**Figure 2. Bayesian temporal and demographic analyses on a representative 200 isolate dataset**

**a.** Bayesian skyline plot (BSP) with the estimation of *Lm*-CC1 effective population size ( $N_e$ ). The y-axis refers to the predicted number of individuals (log scale) and the x-axis to the timescale (in years). The median population size is marked in blue with its 95% high posterior density (HPD) in gray. Blue vertical panels delimitate the three globalization ages (1870-1914, 1944-1971, 1989-present). **b.** Bayesian time-calibrated tree. Nodes represent the estimated mean divergence times and gray bars represent the 95% HPD confidence intervals of node age. Scale indicates time (in years). Terminal branches and tips are colored by continents, as indicated in the key panel.

**Figure 3**

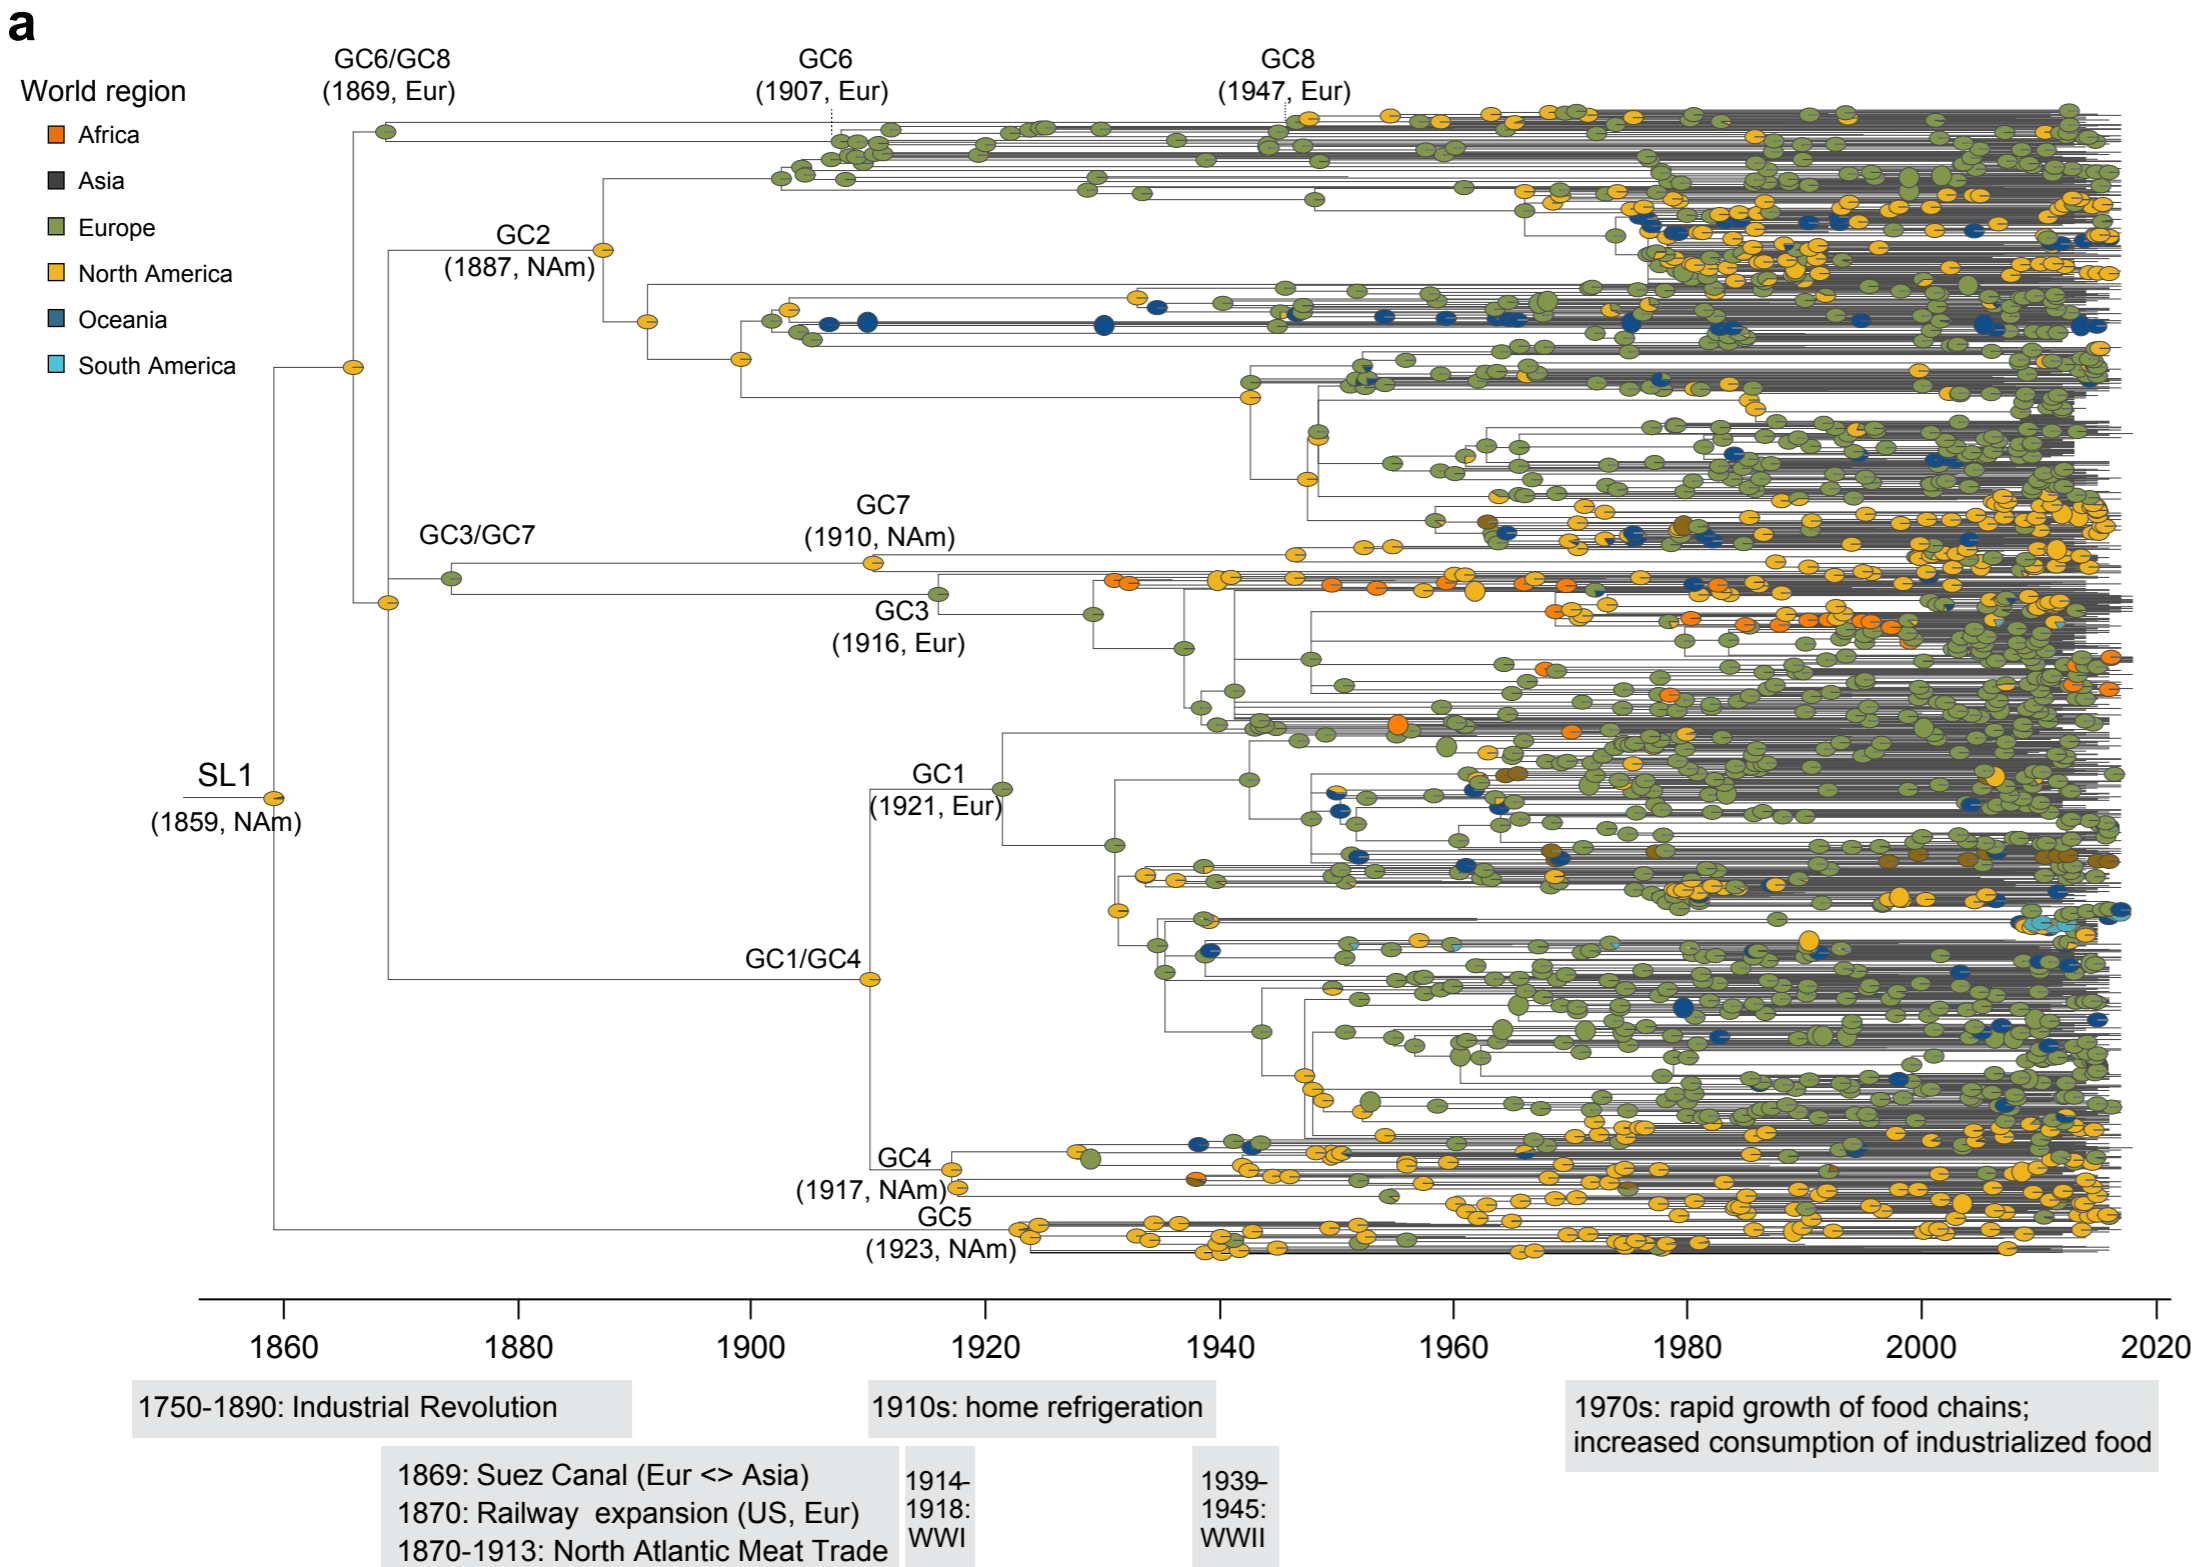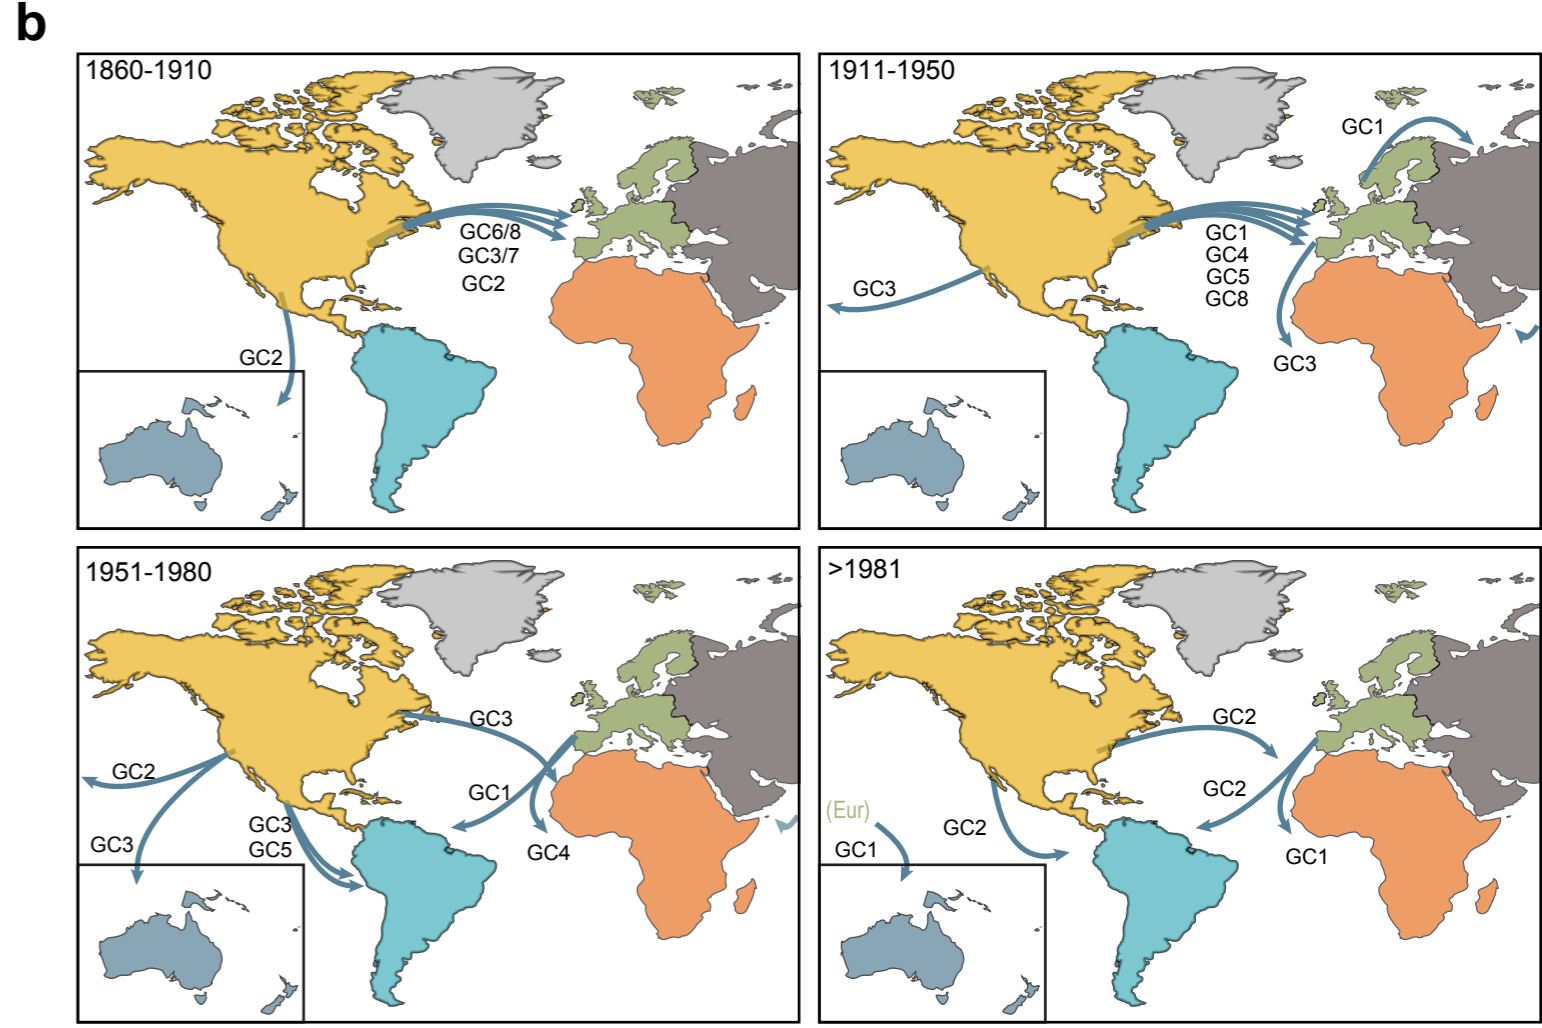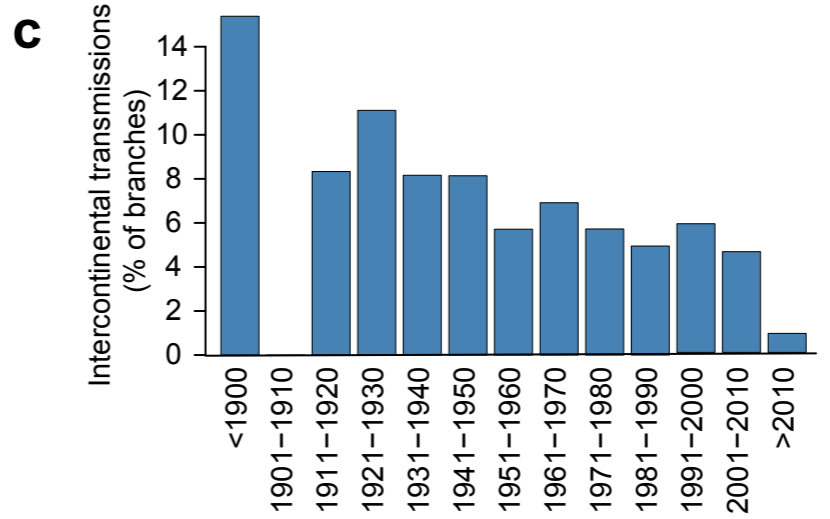

**Figure 3. Phylogeography of sublineage SL1**  
**a.** Time-calibrated phylogeny based on the 1956 SL1 genomes. Pies at the nodes represent the probability of ancestral geographical locations, estimate using PastML using the MPPA method with an F81-like model. **b.** Inferred spread of SL1 populations across continents. The first introductions of each phylogroup are represented by arrows from their estimated world region origin. **c.** Proportion of inter-continental transitions per 10-year bins, normalized by the total number of phylogenetic branches per bin.

**Figure 4****a**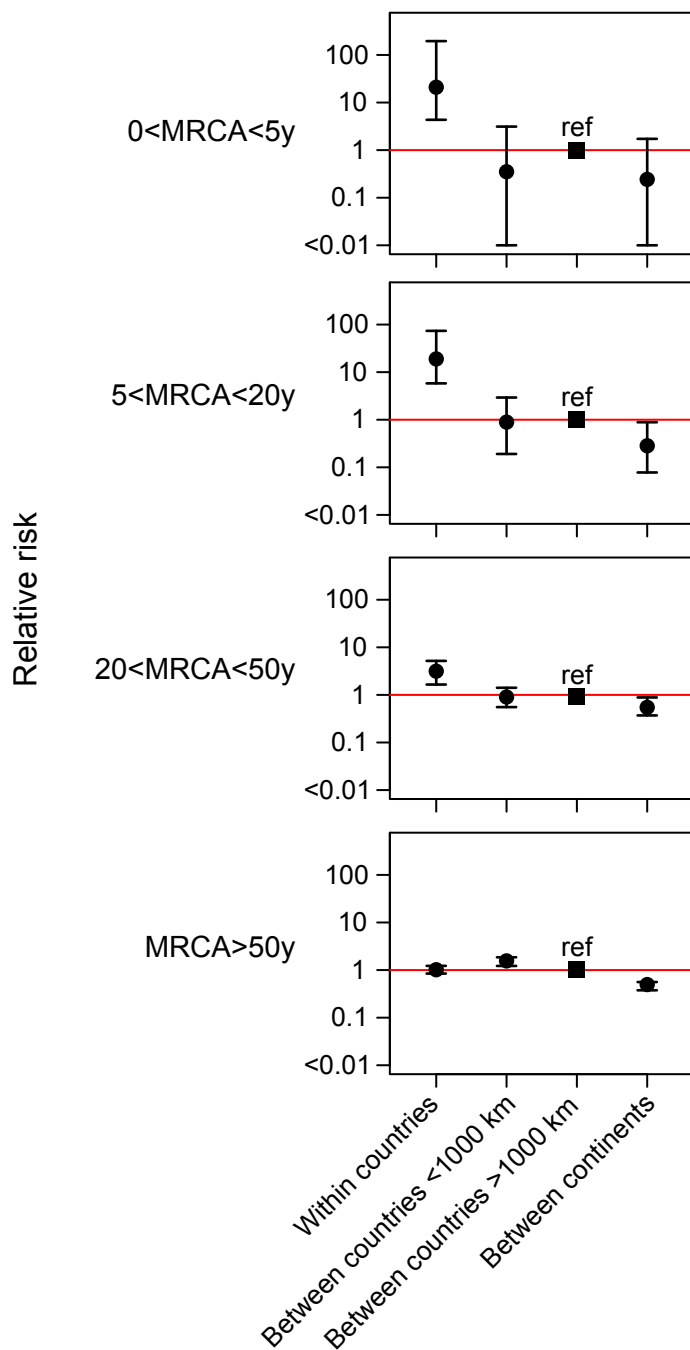**b**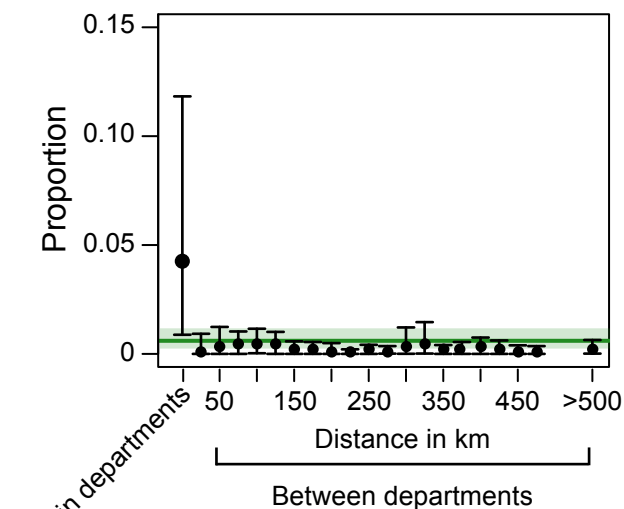**c**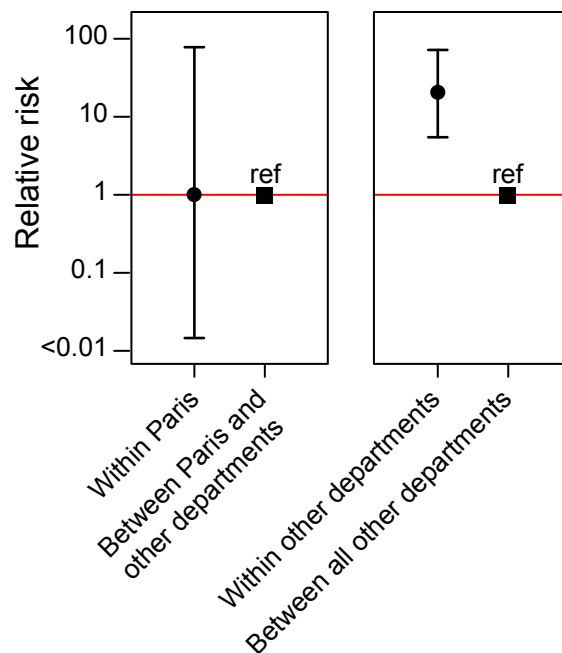**Figure 4. Transmission dynamics of sublineage SL1**

**a.** Each point summarizes the relative risk that a pair of isolates has a MRCA within a defined timeframe and between different spatial scales (within the same country, within the same continent or within different continents), relative to the risk that a pair of isolates from countries separated by >1000km have a MRCA in the same range (set as the reference value, 'ref'). Error bars represent the 95% confidence intervals, based on 100 bootstrap time-calibrated trees. **b.** Proportion of pairs of isolates within the same country (France) sharing a MRCA of 5 or less years in function of the spatial distance within and between administrative departments (shown in the map). The green line indicates the mean proportion of genetically close strains regardless the geographical location. **c.** Left: relative risk for a pair of isolates to share a MRCA of 5 or less years when both are coming from Paris to when coming from another department ( $p=0.43$ ). Right: relative risk for a pair of isolates to share a MRCA of 5 or less years when coming from the same department in France, except Paris, compared to when coming from different departments ( $p<0.001$ , see Material and Methods for details).

1 **Emergence and global spread of the main *Listeria monocytogenes* clinical clonal**  
2 **complex**

3

4 Alexandra Moura, Noémie Lefrancq, Alexandre Leclercq, Thierry Wirth, Vítor Borges, Brent  
5 Gilpin, Timothy J. Dallman, Joachim Frey, Eelco Franz, Eva M. Nielsen, Juno Thomas, Arthur  
6 Pightling, Benjamin P. Howden, Cheryl L. Tarr, Peter Gerner-Smidt, Simon Cauchemez, Henrik  
7 Salje, Sylvain Brisse, Marc Lecuit, for the *Listeria* CC1 Study Group

8

9

**SUPPLEMENTARY MATERIAL**

10 **Table of Contents**

11

12 **1. Supplementary tables..... 2**

13 Table S1. Isolate included in this study. .... 2

14 Table S2. Genetic characteristics of CC1 sublineages and SL1 genetic clades. .... 3

15 Table S3. Sublineage-specific genes present in at least 50% of isolates. .... 4

16 Table S4. SL1 genetic clades-specific genes present in at least 50% of isolates. .... 5

17 Table S5. Human-associated significant loci, as determined by treeWAS. .... 6

18

19 **2. Supplementary figures ..... 7**

20 Figure S1. Frequency of most prevalent clonal complexes among different environments. .... 7

21 Figure S2. Genome metrics of isolates included in this study. .... 8

22 Figure S3. Core genome multilocus sequence typing (cgMLST) analyses. .... 9

23 Figure S4. Phylogenetic analysis based on whole genome SNP analyses. .... 10

24 Figure S5. Genetic diversity among *Lm*-CC1 isolates ..... 11

25 Figure S6. Distribution of *Lm*-CC1 isolates per clade, world regions and source types..... 12

26 Figure S7. CC1 pangenome analysis ..... 13

27 Figure S8. Temporal analyses on a representative dataset of 200 isolates. .... 14

28 Figure S9. Benchmarking of dating methods..... 15

29 Figure S10. Phylogeography inference of *Lm*-CC1 ..... 16

30 Figure S11. Cattle demographics ..... 17

31 Figure S12. French administrative departments (*départements*) ..... 18

32 Figure S13. SL1 transmission dynamics within country (France)..... 19

33

34

35

36 **1. Supplementary tables**

37

38 **Table S1. Isolates included in this study.** [[xls](#)]

39 **Table S2. Genetic characteristics of CC1 sublineages and SL1 genetic clades and statistics by world region.**

40

|                     | <i>n</i> | cgMLST allelic distances | cg1748 SNP distances (1.29 Mb, 11,976 ATGC sites) |            |                      |                     | wgF2365 SNP distances (2.28 M, 29,108 ATGC sites) |            |                      |                     |
|---------------------|----------|--------------------------|---------------------------------------------------|------------|----------------------|---------------------|---------------------------------------------------|------------|----------------------|---------------------|
|                     |          | mean ± stdev             | mean ± stdev                                      | Tajima's D | nucleotide diversity | haplotype diversity | mean ± stdev                                      | Tajima's D | nucleotide diversity | haplotype diversity |
| Phylogroup SL1      | 2002     | 68 ± 23.27               | 38 ± 14.8                                         | -2.69      | 4.33                 | 0.966               | 80 ± 27.4                                         | -2.77      | 63.31                | 0.999               |
| SL404               | 2        | 57                       | 50                                                | nd         | 50.00                | 1.000               | 107                                               | nd         | 107.00               | 1.000               |
| SL150               | 17       | 42 ± 16.90               | 38 ± 16.8                                         | -1.46      | 33.41                | 1.000               | 86 ± 30.9                                         | -1.70      | 79.62                | 1.000               |
| GC1                 | 710      | 39 ± 11.16               | 32 ± 9.5                                          | -2.78      | 10.13                | 0.992               | 67 ± 15.9                                         | -2.82      | 49.05                | 0.997               |
| GC2                 | 684      | 51 ± 18.03               | 45 ± 16.4                                         | -2.70      | 14.92                | 0.991               | 92 ± 30.6                                         | -2.80      | 48.27                | 0.997               |
| GC3                 | 282      | 47 ± 17.41               | 38 ± 14.8                                         | -2.63      | 12.79                | 0.991               | 85 ± 25.8                                         | -2.77      | 65.25                | 0.999               |
| GC4                 | 142      | 46 ± 19.97               | 39 ± 17.3                                         | -2.59      | 24.68                | 0.990               | 100 ± 29.9                                        | -2.73      | 86.73                | 0.992               |
| GC5                 | 63       | 34 ± 13.23               | 28 ± 11.3                                         | -2.38      | 22.38                | 0.995               | 73 ± 23.5                                         | -2.51      | 68.35                | 0.999               |
| GC6                 | 47       | 45 ± 16.00               | 36 ± 13.6                                         | -2.22      | 32.66                | 0.988               | 79 ± 25.6                                         | -2.29      | 73.67                | 0.990               |
| GC7                 | 46       | 28 ± 24.28               | 24 ± 20.8                                         | -1.60      | 19.97                | 0.966               | 63 ± 51.7                                         | -2.03      | 58.94                | 0.998               |
| GC8                 | 28       | 29 ± 7.94                | 25 ± 6.7                                          | -2.39      | 23.18                | 0.997               | 50 ± 10.5                                         | -2.47      | 45.31                | 1.000               |
| World Region Africa | 54       | 66 ± 91.55               | 64 ± 148.7                                        | -2.72      | 41.06                | 0.962               | 146 ± 220.0                                       | -2.62      | 119.17               | 0.997               |
| Asia                | 25       | 85 ± 119.86              | 100 ± 204.3                                       | -2.55      | 67.85                | 0.990               | 187 ± 332.3                                       | -2.49      | 180.76               | 1.000               |
| Europe              | 1236     | 61 ± 24.50               | 53 ± 28.9                                         | -2.74      | 13.42                | 0.995               | 110 ± 44.9                                        | -2.78      | 59.04                | 0.999               |
| North America       | 513      | 92 ± 92.77               | 96 ± 160.3                                        | -2.58      | 28.06                | 0.992               | 194 ± 232.0                                       | -2.68      | 164.93               | 0.998               |
| South America       | 22       | 63 ± 31.91               | 52 ± 27.6                                         | -1.39      | 47.01                | 0.987               | 117 ± 55.0                                        | -1.57      | 114.57               | 0.996               |
| Oceania             | 22       | 63 ± 31.91               | 52 ± 27.6                                         | -1.39      | 47.01                | 0.987               | 117 ± 55.0                                        | -1.57      | 114.57               | 0.996               |

41



42 **Table S3. Sublineage-specific genes present in at least 50% of isolates.** Gray shades  
 43 highlight genes within the same genomic context.

| Remarks                      | Roary_family | Reference locus | Ortholog      | Annotation                                            | Length (nt) | No. isolates | % Isolates (in SL) | #Order in contig |
|------------------------------|--------------|-----------------|---------------|-------------------------------------------------------|-------------|--------------|--------------------|------------------|
| exclusively in SL1           | group_2369   | ID32421_02477   | lmo0671       | hypothetical protein                                  | 293         | 1852         | 93%                |                  |
| exclusively in SL404         | group_7853   | ID31663_01719   | lmo0804       | hypothetical protein                                  | 176         | 2            | 100%               | 1067             |
|                              | group_7852   | ID31663_01117   | LMOF2365_0494 | hypothetical protein                                  | 2150        | 1            | 50%                | 6972             |
| exclusively in SL150         | group_897    | ID32037_02878   |               | hypothetical protein                                  | 260         | 16           | 94%                | 1226             |
|                              | group_6423   | ID32037_02875   | LMOSA_10      | hypothetical protein                                  | 467         | 16           | 94%                | 1229             |
|                              | group_5149   | ID32037_02874   | LMOSA_20      | replication-associated protein                        | 305         | 14           | 82%                | 1230             |
|                              | group_6471   | ID32037_02873   | LMOF2365_0352 | hypothetical protein                                  | 284         | 12           | 71%                | 1231             |
|                              | group_6421   | ID32037_02872   |               | hypothetical protein                                  | 314         | 16           | 94%                | 1232             |
|                              | group_5148   | ID32037_02871   |               | hypothetical protein                                  | 116         | 12           | 71%                | 1233             |
|                              | group_6420   | ID32037_02870   | lmo0339       | inorganic pyrophosphatase                             | 371         | 16           | 94%                | 1234             |
|                              | group_6409   | ID32037_00117   |               | hypothetical protein                                  | 290         | 14           | 82%                | 3282             |
|                              | group_2611   | ID32037_00115   | lmo2044       | peptide ABC transporter substrate-binding protein     | 1664        | 13           | 76%                | 3284             |
|                              | group_6408   | ID32037_00121   | lmo2749       | glutamine amidotransferase                            | 572         | 16           | 94%                | 3302             |
|                              | group_6406   | ID32037_00123   | lmo2375       | hypothetical protein                                  | 395         | 16           | 94%                | 3304             |
|                              | group_6417   | ID32037_01337   |               | hypothetical protein                                  | 110         | 16           | 94%                | 4171             |
|                              | group_6418   | ID32037_01335   | lmo2688       | cell division protein FtsW                            | 1130        | 16           | 94%                | 4175             |
| exclusively in SL150 & SL404 | recD         | ID32037_02916   | LMOSA_12110   | DNA helicase; RecBCD enzyme subunit RecD              | 1355-3608   | 18           | 95%                | 2391             |
| (absent in SL1)              | group_5134   | ID32037_02915   |               | hypothetical protein                                  | 1061-1340   | 18           | 95%                | 2392             |
|                              | group_6411   | ID32037_02914   | lmo0303       | putative secreted, lysin rich protein                 | 551         | 18           | 95%                | 2393             |
|                              | group_6412   | ID32037_02912   | lmo0305       | L-allo-threonine aldolase                             | 1082        | 18           | 95%                | 2395             |
|                              | group_6413   | ID32037_02911   | lmo0306       | hypothetical protein                                  | 467         | 18           | 95%                | 2396             |
|                              | group_6415   | ID32037_02907   | lmo0310       | hypothetical protein                                  | 1076        | 17           | 89%                | 2400             |
| exclusively in SL1 & SL404   | group_152    | ID32421_02841   | LMOF2365_0349 | cell wall surface anchor family protein (LPxTG motif) | 293-3221    | 1380         | 69%                | 2433             |
| (absent in SL150)            | group_1481   | ID32421_01841   | LMOF2365_2341 | aminotransferase, class I                             | 221-1166    | 1936         | 97%                | 3295             |
|                              | group_4436   | ID32421_01836   | lmo2375       | hypothetical protein                                  | 263-392     | 2004         | 100%               | 3309             |
|                              | group_378    | ID32421_01835   |               | reverse transcriptase                                 | 302-1385    | 1977         | 99%                | 3310             |
|                              | group_1844   | ID32421_00303   | lmo2688       | cell division protein FtsW                            | 758-1130    | 1009         | 50%                | 4177             |
|                              | group_1501   | ID32421_00308   | LMOF2365_2670 | N-acetylmuramoyl-L-alanine amidase, family 4          | 1100-1775   | 1450         | 72%                | 4183             |
| exclusively in SL1 & SL150   | group_1153   | ID32421_02877   | lmo0297       | transcriptional antiterminator BglG                   | 593-1871    | 1991         | 99%                | 2373             |
| (absent in SL404)            | sau3AIR      | ID32421_02872   |               | Type-2 restriction enzyme Sau3AI                      | 152-1667    | 1990         | 99%                | 2379             |
|                              | group_4596   | ID32421_02871   | LMOF2365_0326 | transcriptional regulator                             | 164-206     | 2000         | 99%                | 2382             |
|                              | group_1899   | ID32421_02870   | LMOF2365_0327 | cytosine-specific methyltransferase                   | 131-1409    | 1988         | 98%                | 2384             |
|                              | group_1900   | ID32421_02869   | LMOF2365_0328 | hypothetical protein                                  | 236-854     | 1952         | 97%                | 2386             |
|                              | group_1572   | ID32421_02868   | LMOF2365_0329 | putative lipoprotein                                  | 197-554     | 1993         | 99%                | 2387             |
|                              | group_1901   | ID32421_02867   | LMOF2365_0330 | threonine aldolase                                    | 305-1079    | 2000         | 99%                | 2388             |
|                              | group_3681   | ID32421_02866   | LMOF2365_0331 | peptidase, M48 family                                 | 464-920     | 2001         | 99%                | 2389             |
|                              | group_1342   | ID32421_02360   | lmo0804       | hypothetical protein                                  | 155-959     | 1997         | 99%                | 3058             |
|                              | group_5703   | ID32037_01341   |               | hypothetical protein                                  | 89          | 1021         | 51%                | 4167             |
|                              | group_2203   | ID32421_00342   |               | hypothetical protein                                  | 329-632     | 1999         | 99%                | 4215             |
|                              | group_596    | ID32421_00343   |               | hypothetical protein                                  | 248-1286    | 1837         | 91%                | 4216             |
|                              | group_791    | ID32421_00344   |               | hypothetical protein                                  | 455-983     | 1787         | 89%                | 4218             |
|                              | group_5708   | ID32421_00345   |               | hypothetical protein                                  | 299         | 1991         | 99%                | 4222             |
|                              | group_5709   | ID32421_00346   |               | hypothetical protein                                  | 359-359     | 1995         | 99%                | 4223             |
|                              | group_2733   | ID32421_00347   |               | hypothetical protein                                  | 407-773     | 1999         | 99%                | 4224             |
|                              | group_3456   | ID32421_00351   | lmo2724       | 3-demethylubiquinone-9 3-methyltransferase            | 323-443     | 1986         | 98%                | 4229             |
|                              | group_2255   | ID32421_02154   | LMOF2365_0239 | dihydrouridine synthase family protein                | 209-995     | 1585         | 79%                | 4765             |
|                              | group_81     | ID32421_00680   | LMOF2365_0495 | putative lipoprotein                                  | 155-2159    | 1244         | 62%                | 6967             |
|                              | group_2830   | ID32421_00615   | lmo2084       | aminoglycoside phosphotransferase                     | 455-476     | 1862         | 92%                | 7056             |
|                              | group_3057   | ID32421_01316   | lmo1343       | competence protein ComGE                              | 284-284     | 2004         | 99%                | 8031             |
|                              | group_1982   | ID32421_01310   | LMOF2365_1365 | glycine cleavage system T protein GcvT                | 797-1088    | 2009         | 100%               | 8039             |
|                              | group_555    | ID32421_02213   | lmo1721       | transcriptional regulator                             | 788-2771    | 1943         | 96%                | 8392             |
|                              | group_2258   | ID32037_00061   | LMOF2365_1741 | transcriptional regulator, TetR family                | 188-584     | 1950         | 97%                | 8398             |
|                              | group_1540   | ID32421_02218   | lmo1715       | methyltransferase                                     | 185-668     | 1940         | 96%                | 8399             |
|                              | group_1048   | ID32421_00984   | lmo0738       | PTS beta-glucoside transporter subunit IIABC          | 698-1448    | 1879         | 93%                | 8654             |
|                              | group_5905   | ID32421_00985   | lmo0116       | hypothetical protein_lmaC_phageA118                   | 167         | 2015         | 100%               | 8657             |
|                              | group_1669   | ID32421_00989   | lmo1655       | vanZ-like protein                                     | 128-563     | 1889         | 94%                | 9030             |

44  
45

**Table S4. SL1 genetic clades-specific genes present in at least 50% of isolates.**

Clades-specific genes were only found in GC3 and GC7. Gray shadows highlight genes within the same genomic context.

| Remarks            | Roary_family | Reference locus | Ortholog                                                | Annotation                                              | Length (nt) | No. isolates | % Isolates (in GC) | #Order in contig |
|--------------------|--------------|-----------------|---------------------------------------------------------|---------------------------------------------------------|-------------|--------------|--------------------|------------------|
| exclusively in GC3 | group_1376   | ID106_01313     |                                                         | fibrinogen-binding protein                              | 1562-2693   | 215          | 76%                | 7335             |
|                    | group_5934   | ID106_01309     |                                                         | hypothetical protein                                    | 1301        | 271          | 96%                | 7345             |
|                    | group_5933   | ID106_01308     |                                                         | hypothetical protein                                    | 485         | 271          | 96%                | 7346             |
|                    | group_4885   | ID106_01307     |                                                         | hypothetical protein                                    | 212-374     | 271          | 96%                | 7347             |
|                    | group_5932   | ID106_01306     |                                                         | hypothetical protein                                    | 1019        | 271          | 96%                | 7348             |
|                    | group_5931   | ID106_01305     |                                                         | hypothetical protein                                    | 338         | 271          | 96%                | 7349             |
|                    | group_4884   | ID106_01304     |                                                         | hypothetical protein                                    | 269-686     | 271          | 96%                | 7350             |
|                    | group_3147   | ID106_01302     |                                                         | hypothetical protein                                    | 1253-1769   | 269          | 95%                | 7356             |
|                    | group_3146   | ID106_01301     |                                                         | P60 protein                                             | 812-1025    | 271          | 96%                | 7358             |
|                    | group_2504   | ID106_01300     |                                                         | cadmium resistance protein_cadA                         | 1403-2105   | 268          | 95%                | 7359             |
|                    | group_4029   | ID106_01299     |                                                         | cadmium efflux system accessory protein_cadC            | 236-356     | 267          | 95%                | 7360             |
|                    | group_5930   | ID106_01298     |                                                         | ABC transporter- permease protein                       | 770         | 270          | 96%                | 7361             |
|                    | group_4883   | ID106_01297     |                                                         | ABC transporter- ATP-binding protein                    | 278-935     | 271          | 96%                | 7362             |
|                    | group_5929   | ID106_01296     |                                                         | hypothetical protein                                    | 173         | 269          | 95%                | 7363             |
|                    | group_5928   | ID106_01295     |                                                         | dihydroliipoamide dehydrogenase                         | 1673        | 271          | 96%                | 7364             |
|                    | acr3_2       | ID106_01293     |                                                         | Arsenical-resistance protein Acr3                       | 1076        | 271          | 96%                | 7370             |
|                    | group_5926   | ID106_01291     |                                                         | ArsR family transcriptional regulator                   | 365         | 271          | 96%                | 7379             |
|                    | arsD_1       | ID106_01290     |                                                         | Arsenical resistance operon trans-acting repressor ArsD | 371         | 271          | 96%                | 7380             |
|                    | group_5924   | ID106_01289     |                                                         | cadmium efflux system accessory protein_cadC            | 293         | 271          | 96%                | 7381             |
|                    | arsA_2       | ID106_01288     |                                                         | Arsenical pump-driving ATPase                           | 263-1739    | 271          | 96%                | 7382             |
| arsD_2             | ID106_01287  |                 | Arsenical resistance operon trans-acting repressor ArsD | 311                                                     | 270         | 96%          | 7383               |                  |
| group_5922         | ID106_01286  |                 | cystathionine beta-lyase                                | 1142-1142                                               | 270         | 96%          | 7384               |                  |
| group_5921         | ID106_01285  |                 | hypothetical protein                                    | 458                                                     | 254         | 90%          | 7385               |                  |
| group_4882         | ID106_01284  |                 | hypothetical protein                                    | 302-404                                                 | 256         | 91%          | 7386               |                  |
| exclusively in GC7 | group_8396   | ID32182_02420   |                                                         | hypothetical protein                                    | 326         | 42           | 91%                | 1150             |

**Table S5. Human-associated significant loci**, as determined using treeWAS, with a significance threshold of  $p < 10^{-5}$ .

| Gene        | Annotation                         | treeWAS score | Association type | G1P1 | G0P0 | G1P0 | G0P1 |
|-------------|------------------------------------|---------------|------------------|------|------|------|------|
| group_1361  | hypothetical protein               | 24            | positive         | 1303 | 88   | 480  | 150  |
| group_2465  | valyl-tRNA synthetase_valS         | 22            | positive         | 1300 | 89   | 479  | 153  |
| group_1038  | N-acetylmuramoyl-L-alanine amidase | 26            | positive         | 1265 | 96   | 472  | 188  |
| group_619   | hypothetical protein               | 23            | positive         | 1175 | 138  | 430  | 278  |
| group_10387 | tRNA-Glu(ttc)                      | 25            | positive         | 1041 | 181  | 387  | 412  |
| group_497   | hypothetical protein               | 24            | positive         | 1029 | 190  | 378  | 424  |
| group_1926  | transcriptional regulator          | 25            | positive         | 1024 | 193  | 375  | 429  |
| group_706   | hypothetical protein               | 25            | positive         | 1020 | 191  | 377  | 433  |
| group_1527  | hypothetical protein               | 24            | positive         | 1007 | 186  | 382  | 446  |
| group_209   | hypothetical protein               | 24            | positive         | 866  | 254  | 314  | 587  |
|             |                                    |               |                  |      |      |      |      |
| group_6398  | tRNA-Val(tac)                      | -25           | negative         | 611  | 246  | 322  | 842  |
| group_10476 | 5S ribosomal RNA                   | -31           | negative         | 520  | 253  | 315  | 933  |
| group_10390 | tRNA-Glu(ttc)                      | -33           | negative         | 532  | 276  | 292  | 921  |
| group_10432 | tRNA-Lys(ttt)                      | -35           | negative         | 499  | 289  | 279  | 954  |
| group_10162 | tRNA-Asn(gtt)                      | -29           | negative         | 461  | 309  | 259  | 992  |
| group_10094 | hypothetical protein               | -28           | negative         | 492  | 362  | 206  | 961  |
| group_10662 | hypothetical protein               | -30           | negative         | 479  | 358  | 210  | 974  |
| group_1927  | transcriptional regulator          | -25           | negative         | 430  | 375  | 193  | 1023 |
| group_499   | hypothetical protein               | -23           | negative         | 404  | 397  | 171  | 1049 |
| group_10488 | 5S ribosomal RNA                   | -41           | negative         | 282  | 399  | 169  | 1171 |
| group_4211  | 5S ribosomal RNA (partial)         | -37           | negative         | 227  | 398  | 170  | 1226 |
| group_60    | putative lipoprotein               | -27           | negative         | 188  | 476  | 92   | 1265 |
| group_533   | hypothetical protein               | -22           | negative         | 74   | 508  | 60   | 1379 |
| group_6404  | hypothetical protein               | -22           | negative         | 36   | 518  | 50   | 1417 |

G, genome; P, phenotype; 0 absent, 1 present.

## 2. Supplementary figures

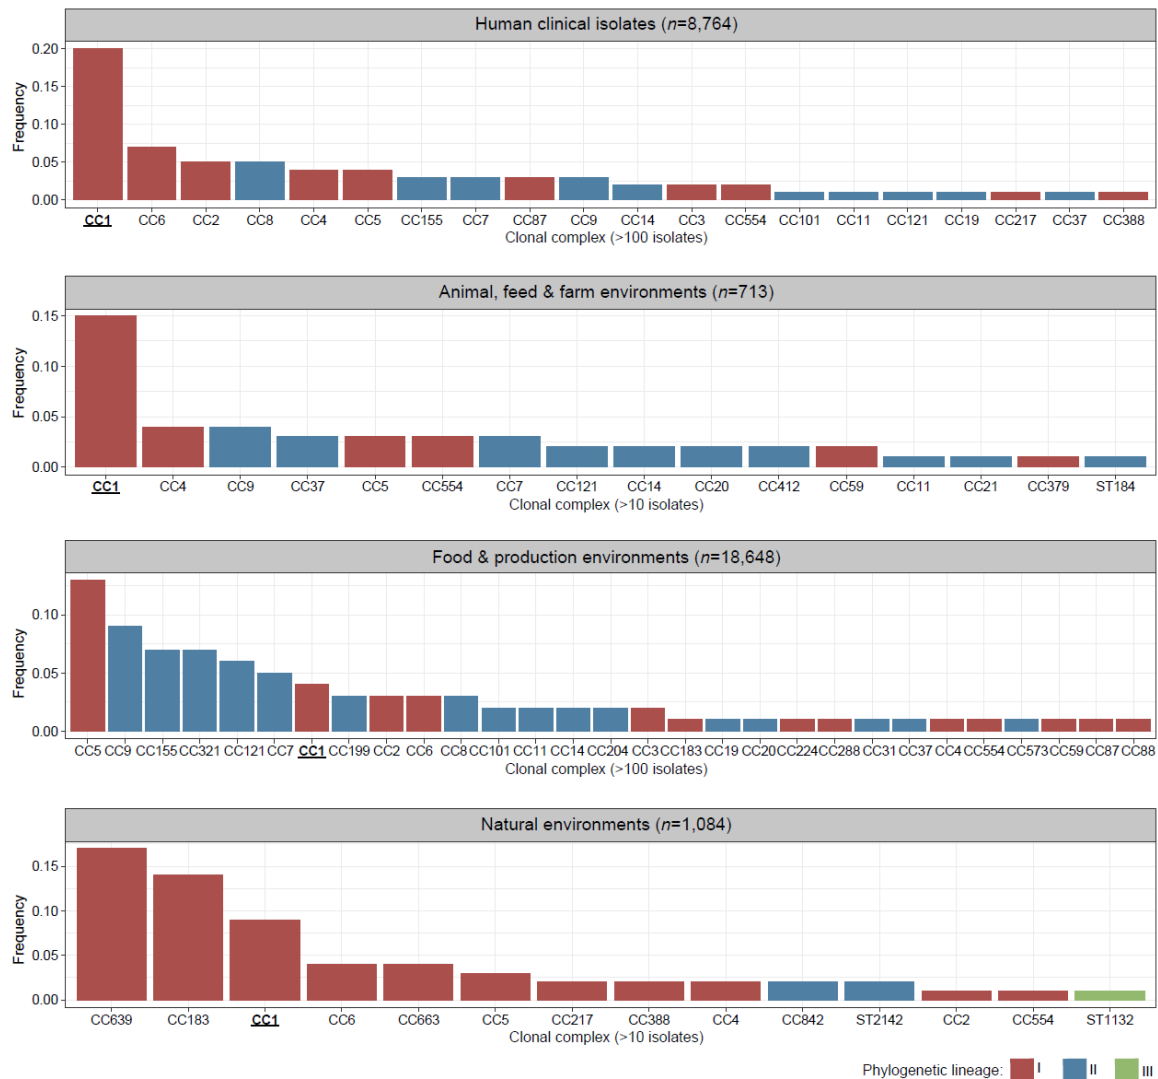

**Figure S1. Frequency of most prevalent clonal complexes among different environments.** Data collected based on 29,349 *L. monocytogenes* genomes with associated source metadata available on NCBI Sequence Read Archive (as of October 23<sup>rd</sup>, 2020). MLST typing was performed from reads using the srst2 v.0.1.5 software (<http://katholt.github.io/srst2>) and the BIGSdb-*Lm* profiles database (<https://bigsdb.pasteur.fr/listeria>).

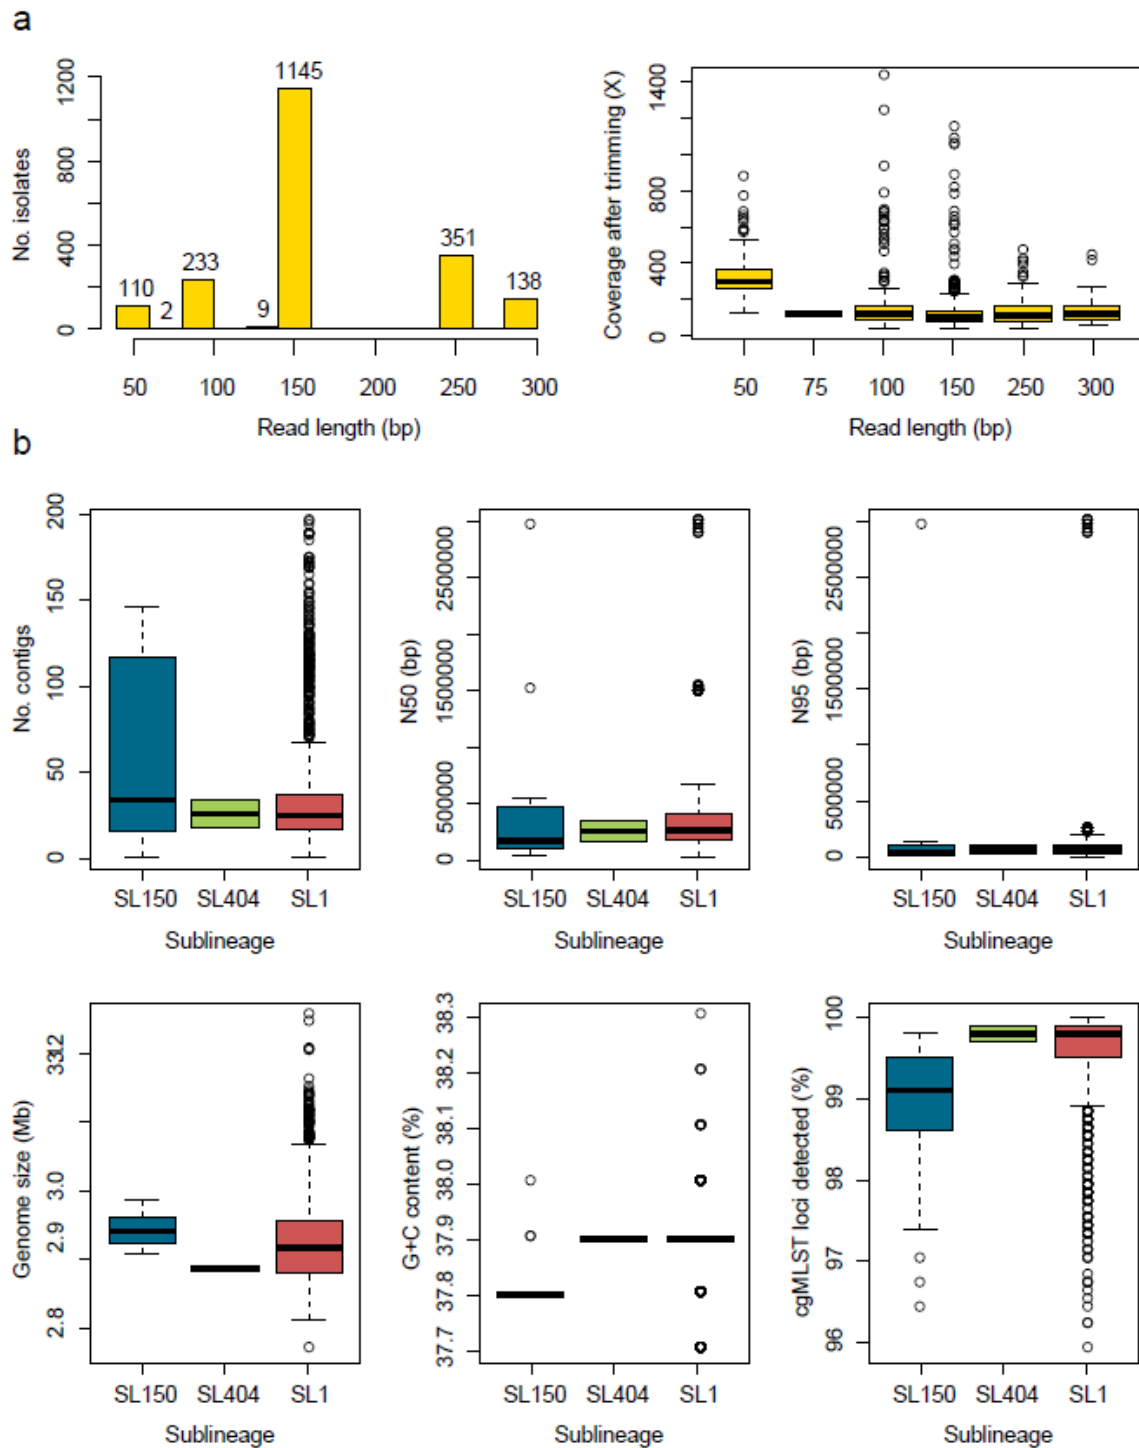

**Figure S2. Genome metrics of isolates included in this study.**

a) Distribution of isolates per sequence read length (left) and distribution of sequencing coverages after reads quality trimming (right).

b) Assembly metrics per CC1 sublineages, based on the number of contigs, N50 and N95 contig lengths, genome size, G+C content and cgMLST loci detected.

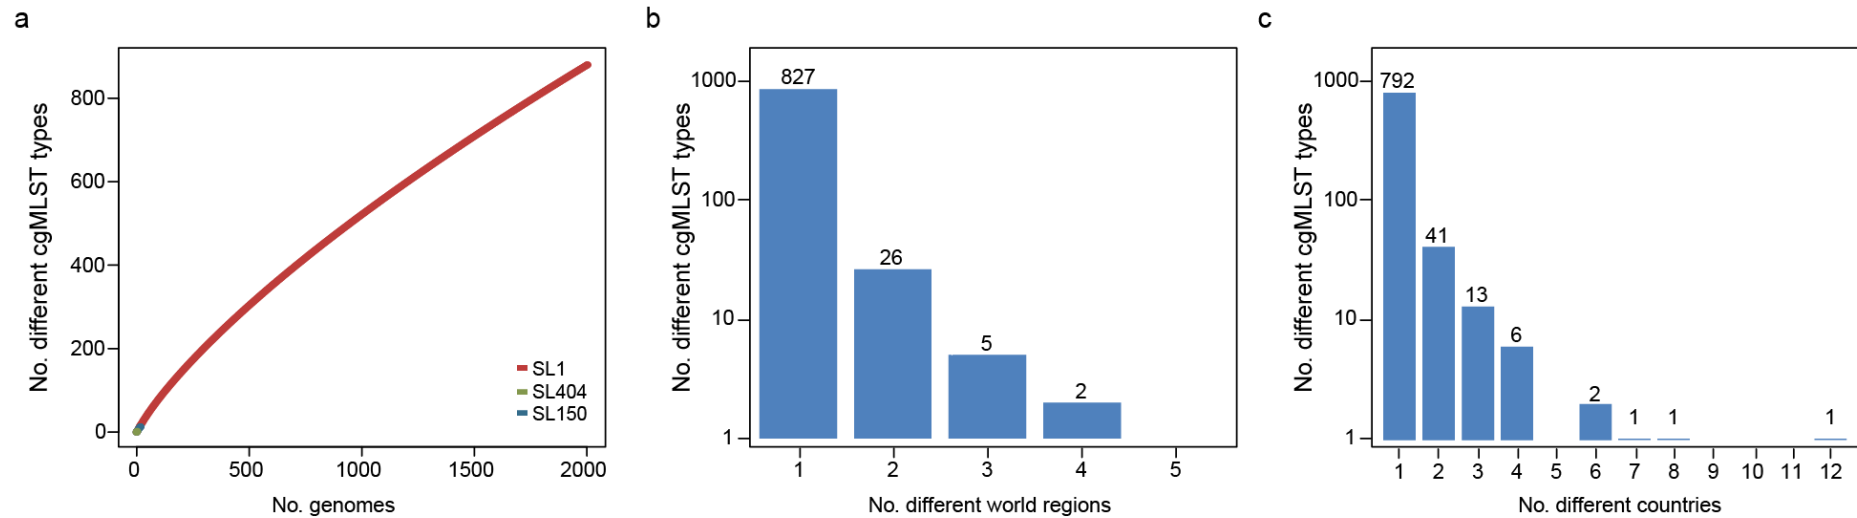

**Figure S3. Core genome multilocus sequence typing (cgMLST) analyses.**

a) Rarefaction analysis of cgMLST types sampled per sublineage.

b) Number of SL1 cgMLST types per number of different world regions in which they were observed ( $n=860$  types with world region information).

c) Number of SL1 cgMLST types per number of different countries in which they were observed ( $n=857$  types with country information).

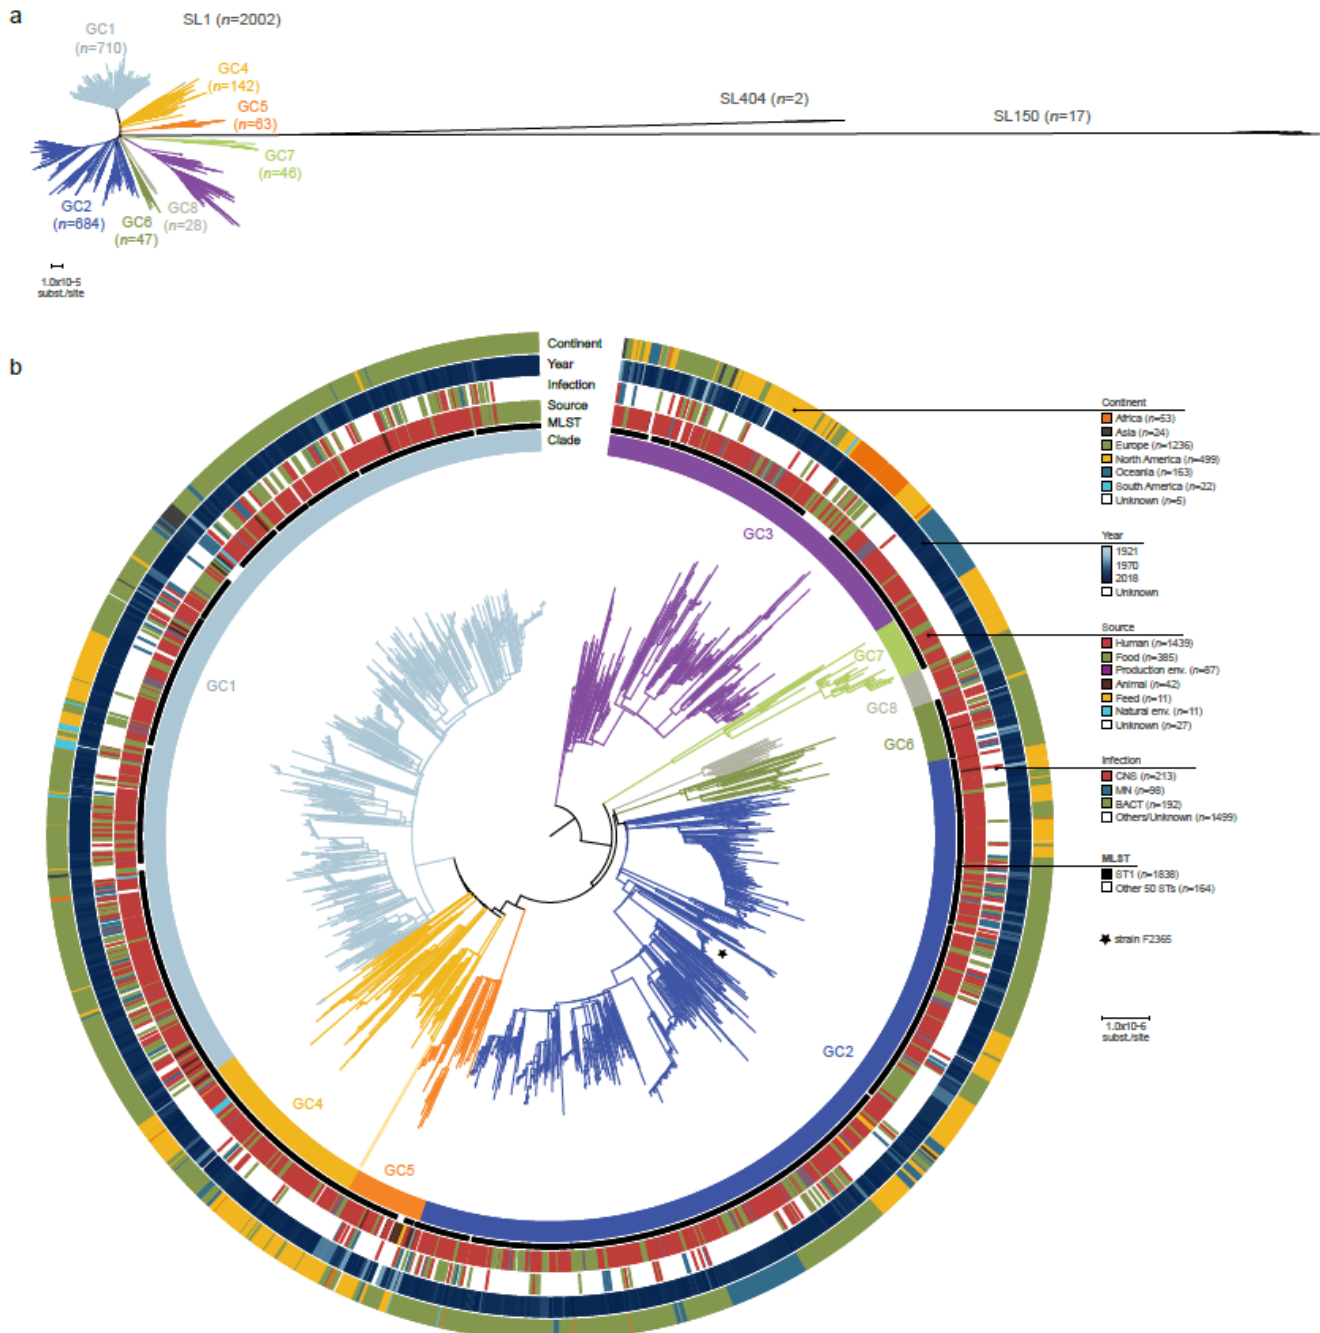

**Figure S4. Phylogenetic analysis based on whole genome SNP analyses.**

a) Unrooted maximum-likelihood phylogeny (GTR+F+G4 model, 1000 ultra-fast bootstraps, using IQ-Tree<sup>23,26</sup>) of 2,021 CC1 genomes based on the recombination-purged whole genome SNP alignment of 2.28 Mb.

b) Midpoint rooted maximum-likelihood phylogenetic tree of 2,002 SL1 genomes based on based on the recombination-purged whole genome SNP alignment of 2.28 Mb. The four external rings indicate the world region, year, type of infection and source type, respectively. The two inner rings indicate ST1 isolates and the 8 SL1 genetic clades identified in this study, respectively. The black star highlights the phylogenetic placement of isolate F2365 (accession no. NC\_002973.6), used as reference in whole genome read mapping.

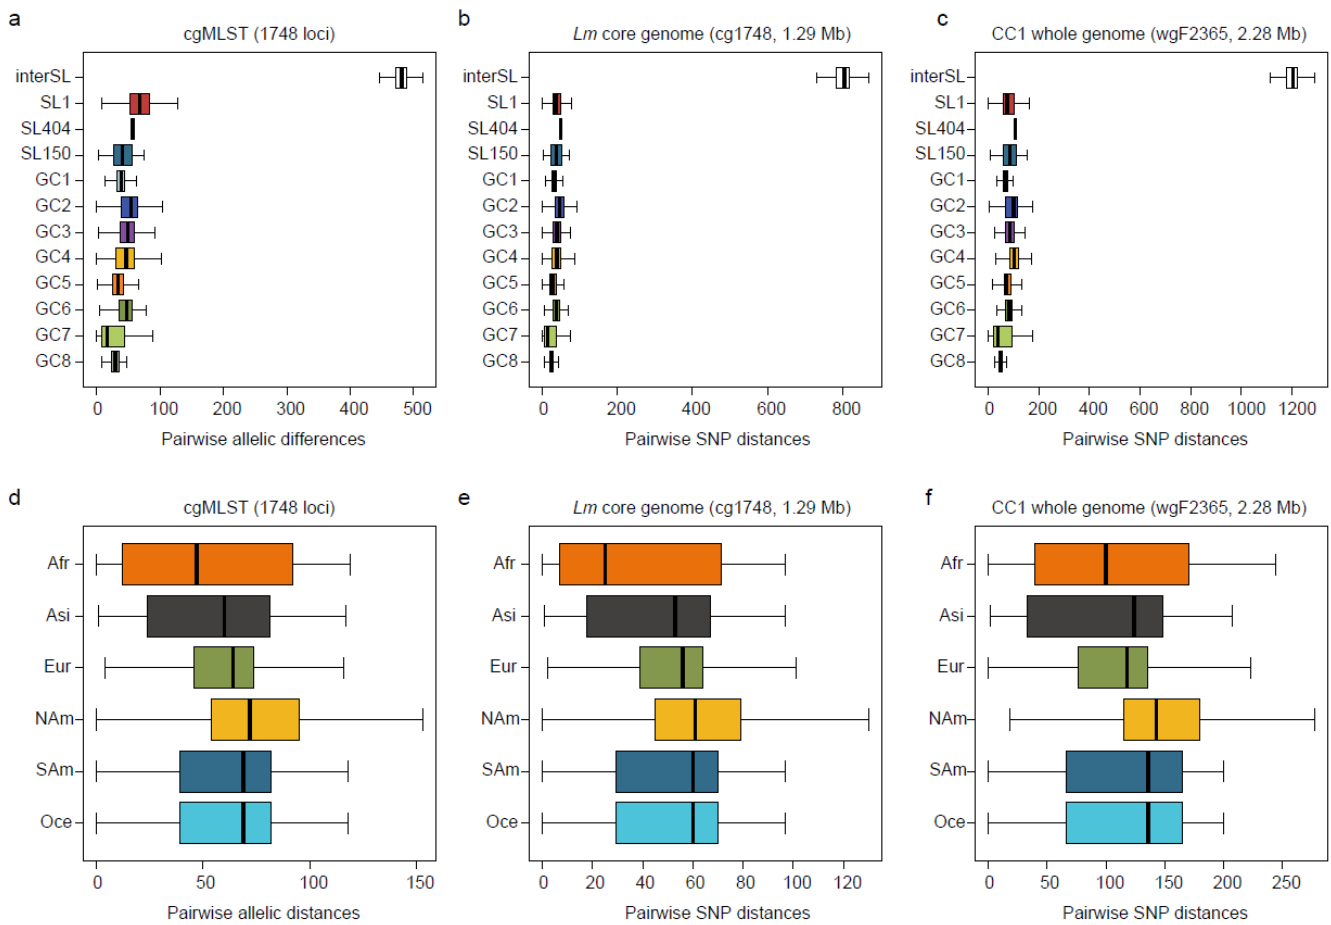

**Figure S5. Genetic diversity among *Lm*-CC1 isolates.**

Pairwise isolate distances within CC1 phylogroups (top) and world regions (bottom): a,d) pairwise cgMLST allelic distances; b,e) pairwise SNP distances in recombination-purged *Lm* core genome alignment and c,f) recombination-purged CC1 whole genome alignment. Uncalled alleles, Ns and gap alignment positions were ignored in pairwise comparisons. Each box denotes the 25% and 75% quartiles and lines represent the medians. Inter-SL, inter CC1 sublineages; GC#, within SL1 genetic clades; Afr, Africa; Asi, Asia; Eur, Europe; NAm, North America; Sam, South America; Oce, Oceania.



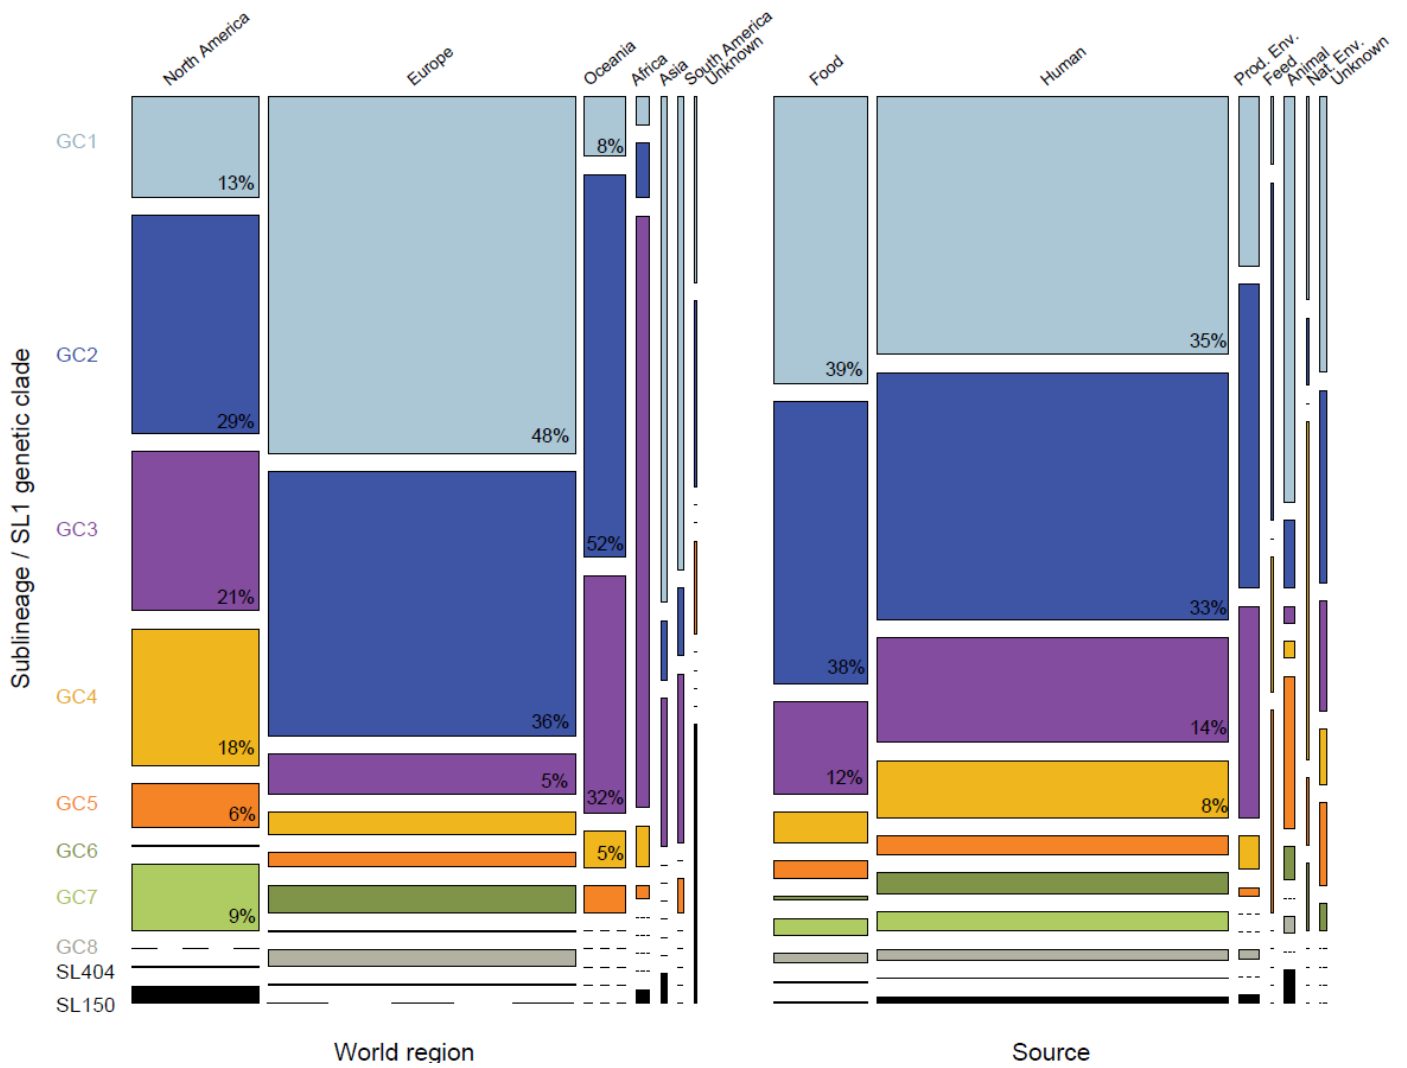

**Figure S6. Distribution of *Lm*-CC1 isolates per clade, world regions and source types (N=2,021).**

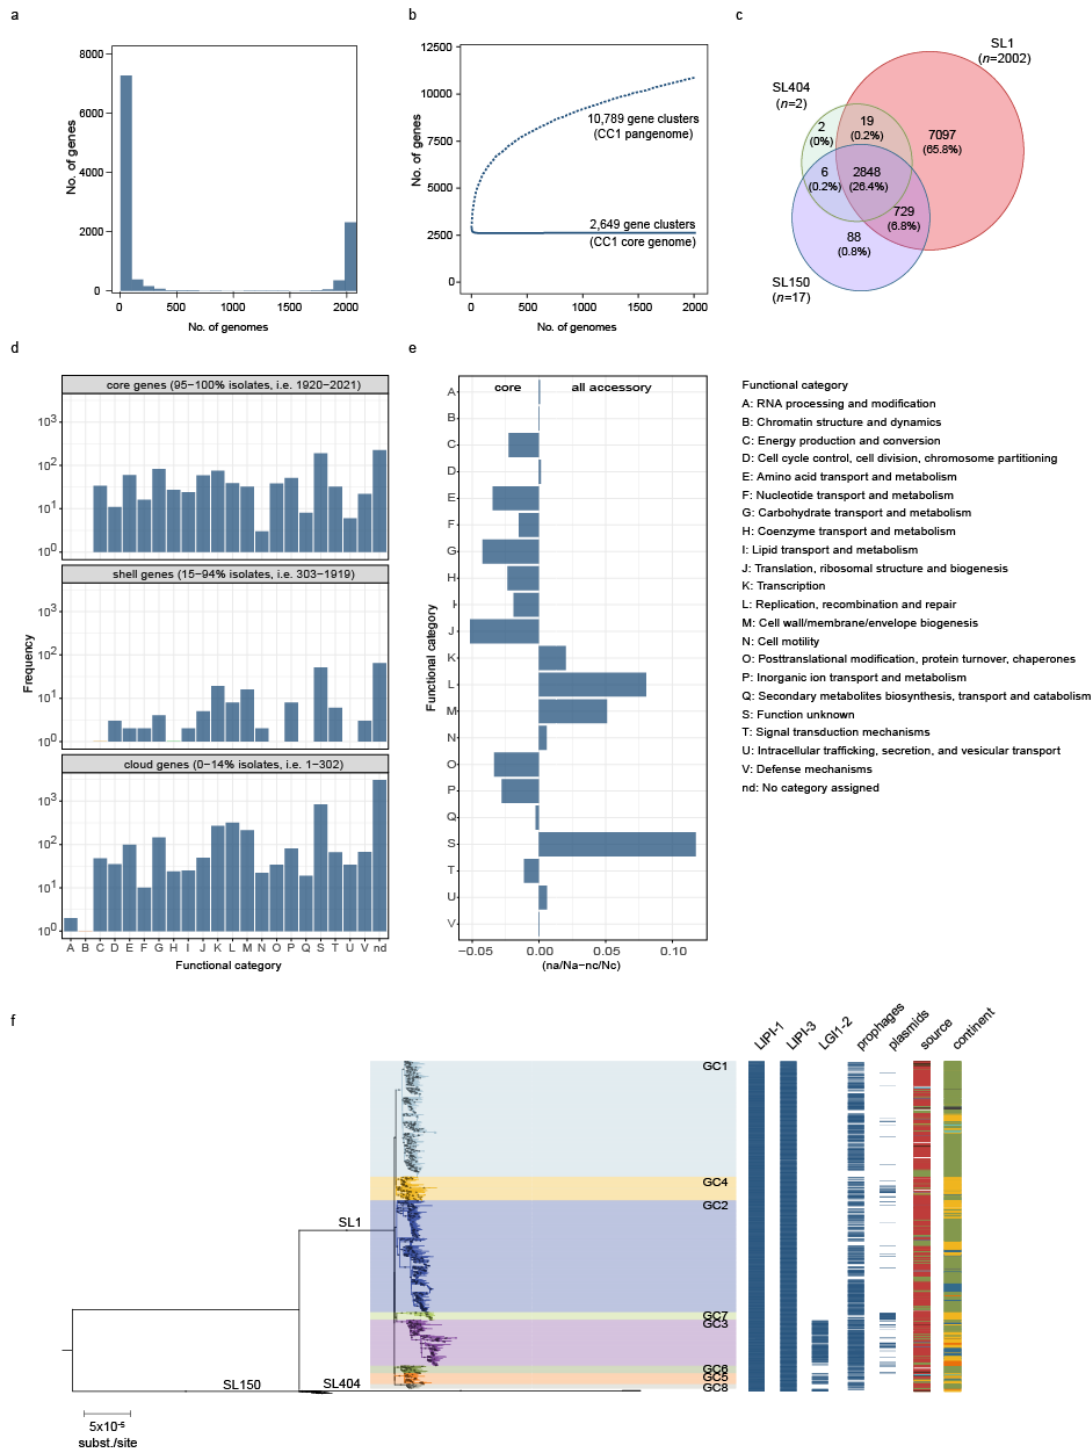

**Figure S7. CC1 pangenome analysis.**

a) Frequency of sampled gene families. b) Pan- and core gene families sampled. c) Venn diagram showing the number of gene families present in at least 1 sublineage member. d) Distribution of the functional categories of the clusters of orthologous genes across the CC1 pangenome. e) Differential proportion of each assigned COG category in core vs accessory genome, calculated as the difference between the ratio of each category ( $n$ ) and the total number of hits ( $N$ ) among each gene pool set, as in  $(n_{accessory}/N_{accessory} - n_{core}/N_{core})$ . f) Distribution of *Listeria* genomic islands, prophages and plasmids and across CC1 phylogeny. The midpoint rooted maximum-likelihood phylogenetic tree (GTR+F+G4 model, 1000 ultra-fast bootstraps) was inferred from the 1.29 Mb recombination-purged core genome alignment of 2,021 CC1 genomes. Sources, continents and SL1 clades are colored according to the color codes shown in Figure S4.

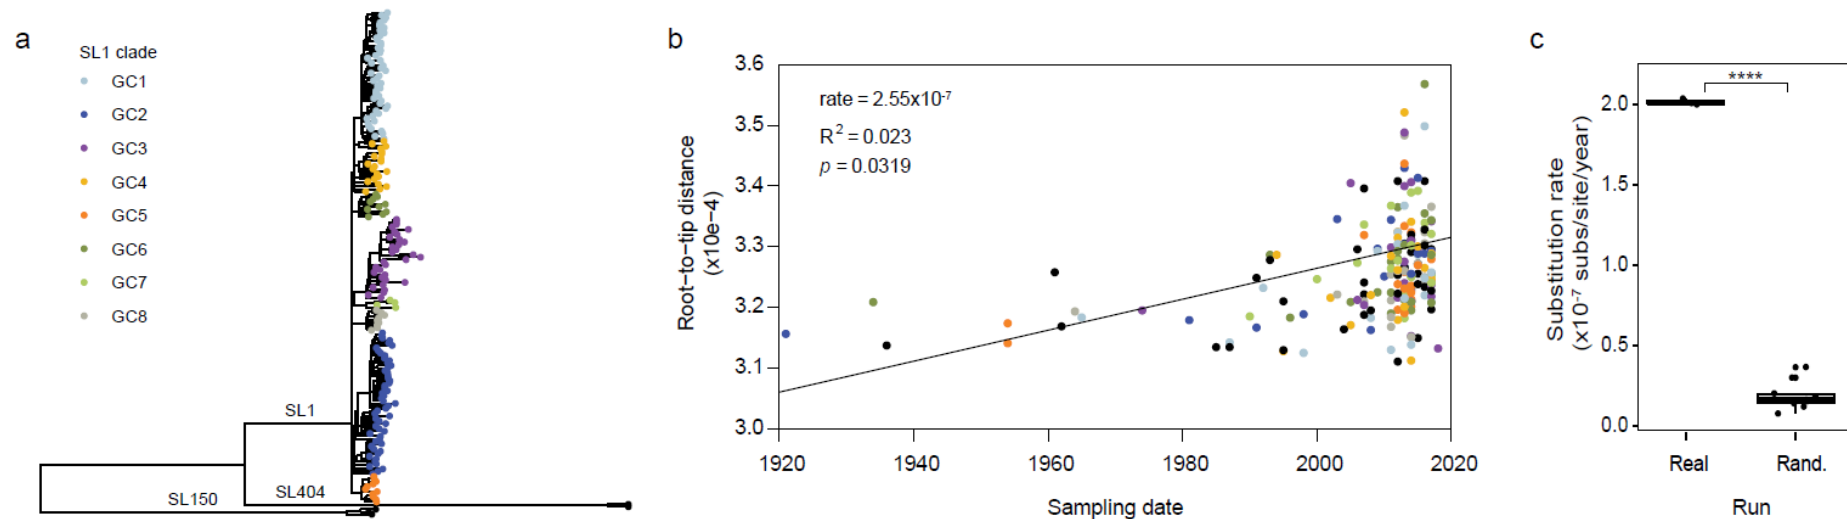

**Figure S8. Temporal analyses on a representative dataset of 200 isolates.**

a) Maximum likelihood (GTR+F+G4) phylogeny of the representative 200 isolates selected randomly across the CC1 phylogeny. Tips are colored by sublineage and SL1 genetic clades as indicated in the legend. b) Regression analyses showing the root-to-tip genetic distance against sampling date (year). Statistical significance was assessed using the F-test. c) Bayesian molecular clock estimations in real and randomized tip dates (controls). Estimations based on real data were run in triplicates, whereas estimations based on randomized tip datasets were run in 10 replicates. Stars denote statistical significance of  $p < 0.0001$ , assessed using t-test.

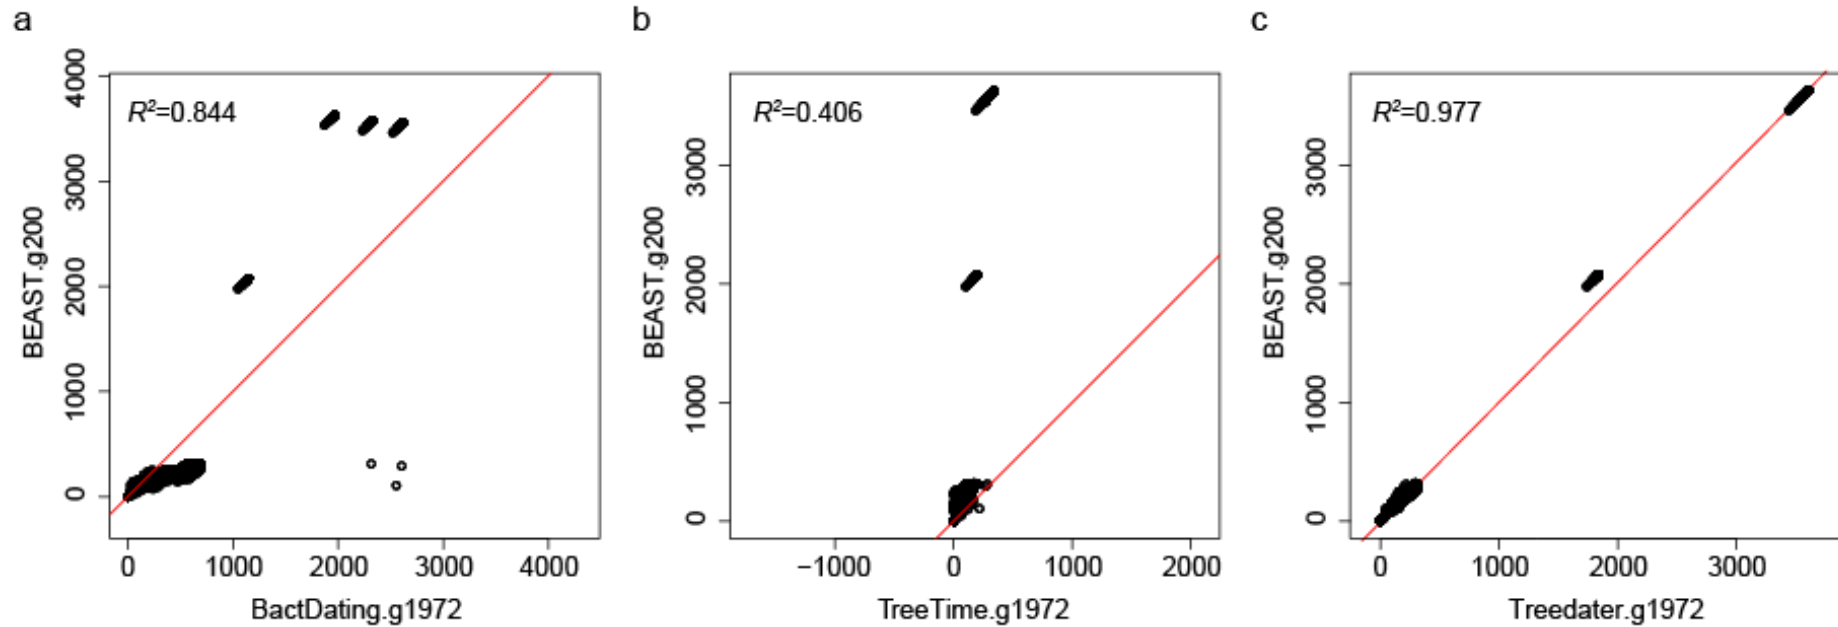

**Figure S9. Benchmarking of dating methods.**

Cophenetic distances between isolates dated with BEAST and alternative large-scale methods: a) BactDating v.1.0.1, b) Treetime v.0.5.2 and c) Treedater v.0.3.0, using the CC1 estimated rate of  $1.954 \times 10^{-7} \pm 2.0152 \times 10^{-8}$  substitutions/site/year obtained with BEAST. “g200” and “g1972” refer to the number of CC1 genomes used in each analyses ( $n=200$  and  $n=1,972$ , respectively). Red lines denote perfect positive correlation coefficients ( $R^2=1$ ).

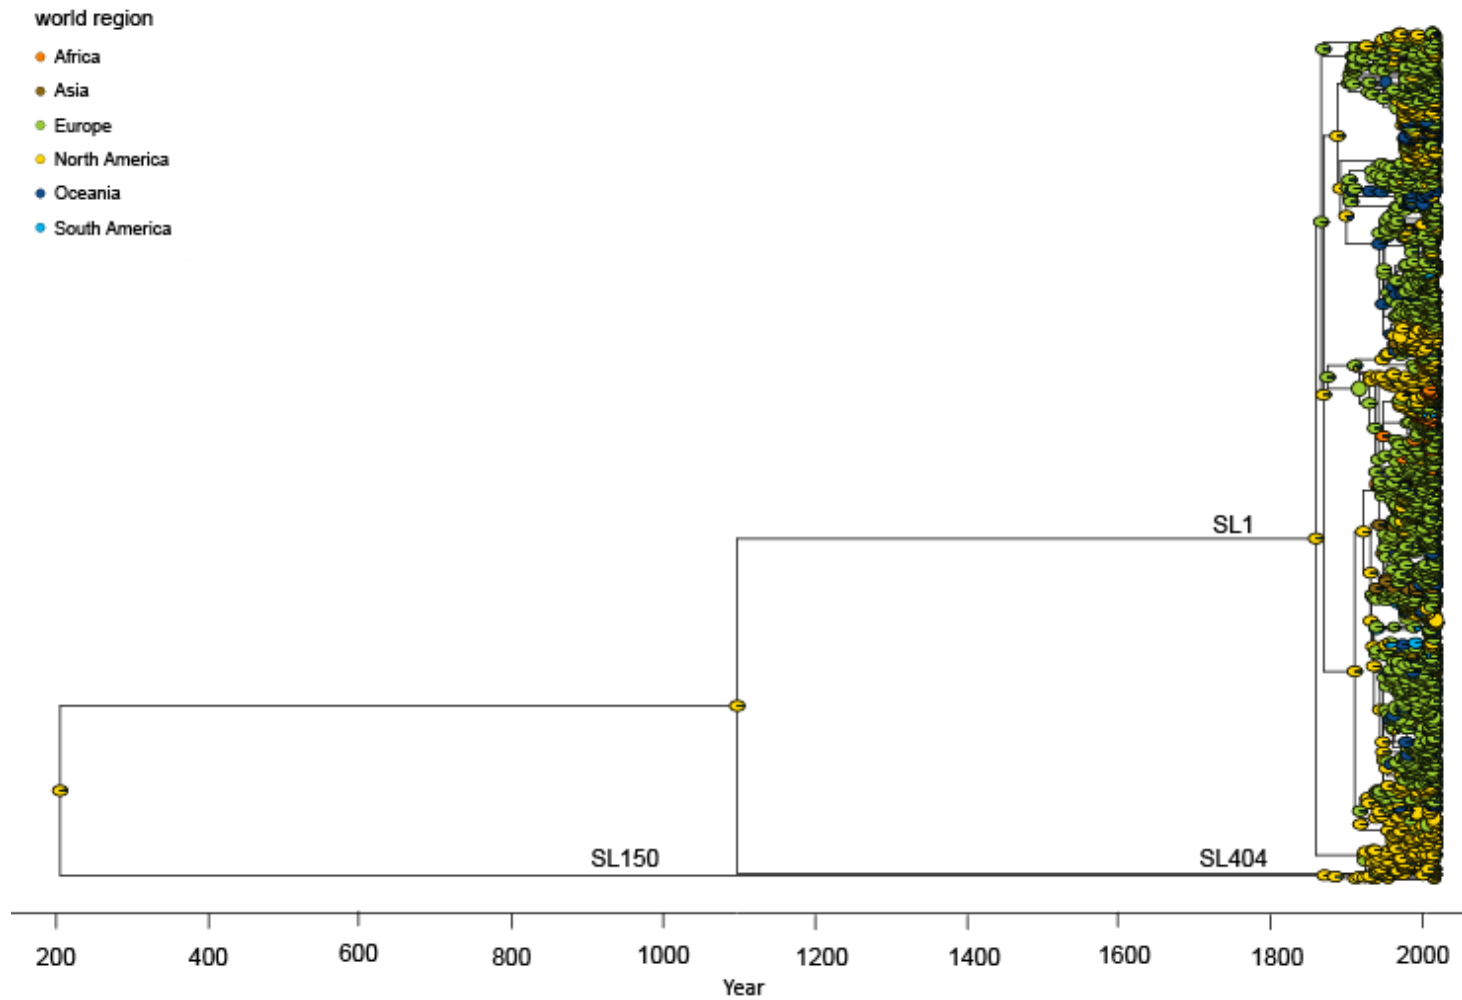

**Figure S10. Phylogeography inference of *Lm-CC1* based on 1972 dated genomes.**

Pies at the nodes represent the probability of ancestral geographical locations, estimate using PastML using the MPPA method with an F81-like model. The detailed view of SL1 can be found in Figure 3.

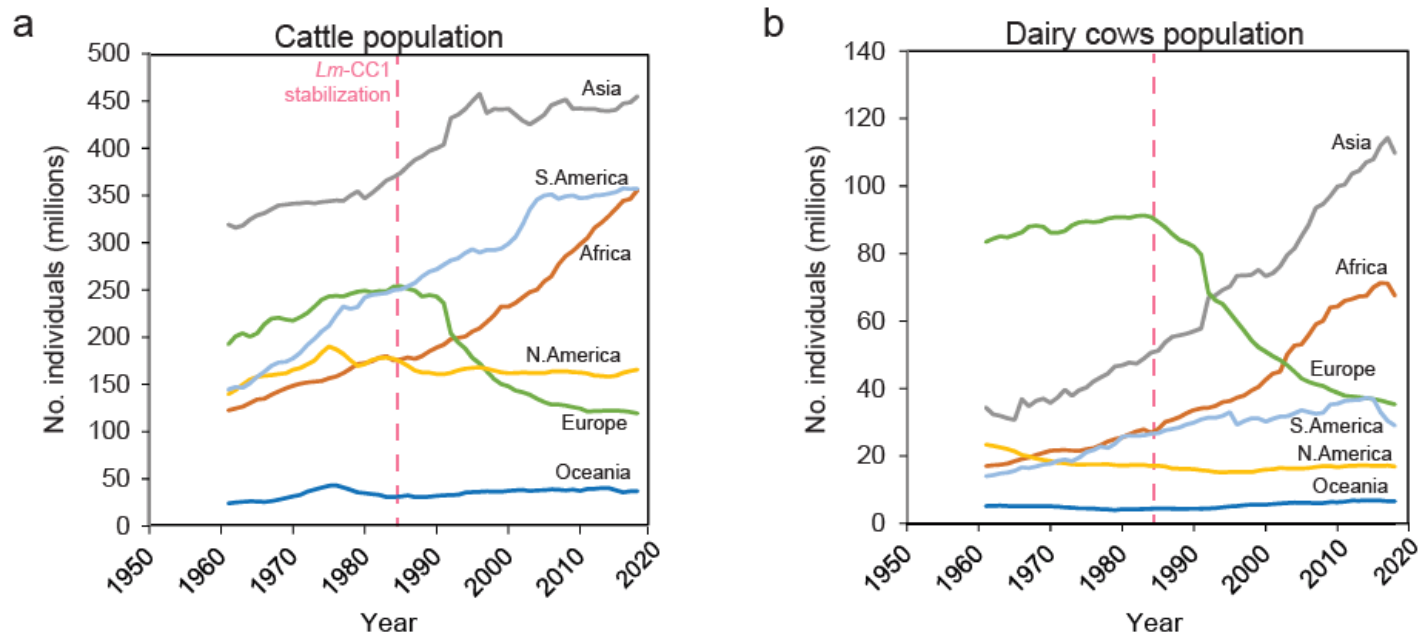

**Figure S11. Cattle demographics.**

a) Cattle population per world region; b) Dairy cows per world region. Data available for 1961-2018; source: Food and Agriculture Organization of the United Nations; [www.fao.org/faostat](http://www.fao.org/faostat)). Vertical dashed bars mark the estimated date of the stabilization of *Lm-CC1* population size.

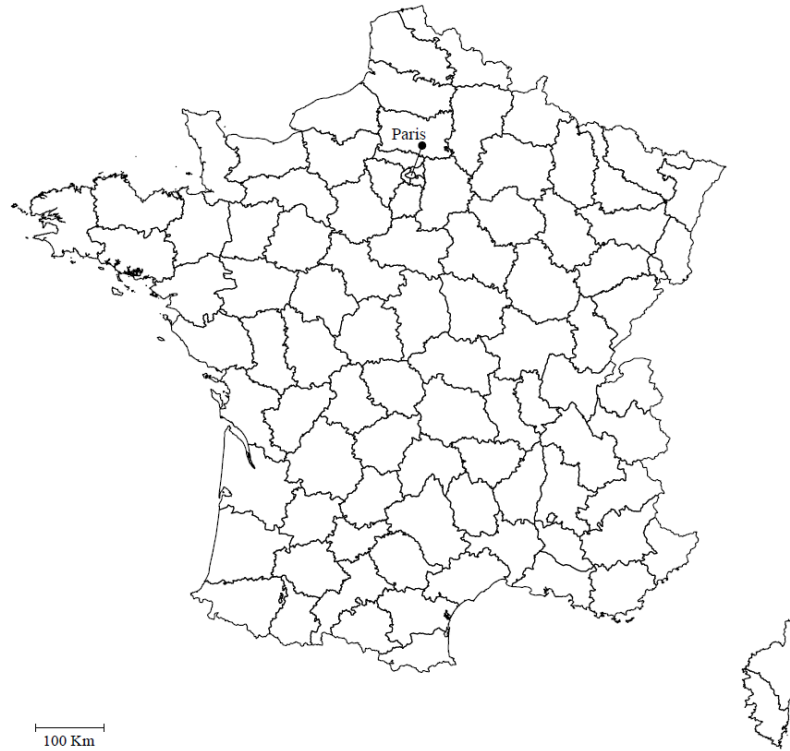

**Figure S12. French administrative Departments (*départements*).** Source: Global Administrative Areas, [gadm.org](http://gadm.org).

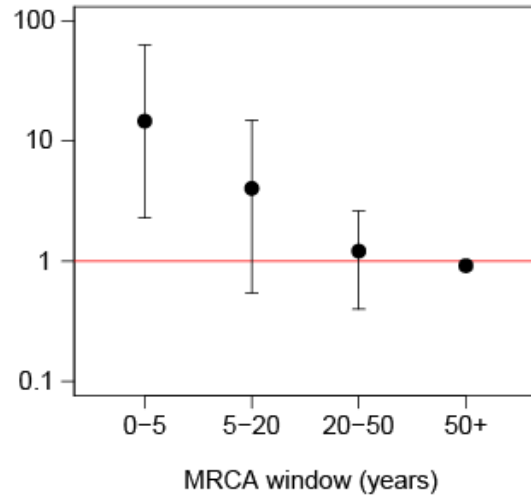

**Figure S13. SL1 transmission dynamics within country (France).** Relative risk for a pair of isolates to have a MRCA within a defined period when coming from the same Department in France *versus* different ones.



## Emergence and global spread of *Listeria monocytogenes* main clinical clonal complex

Alexandra Moura<sup>1,2,3,\*</sup>, Noémie Lefrancq<sup>4,†</sup>, Alexandre Leclercq<sup>1,2</sup>, Thierry Wirth<sup>5,6</sup>, Vítor Borges<sup>7</sup>, Brent Gilpin<sup>8</sup>, Timothy J. Dallman<sup>9</sup>, Joachim Frey<sup>10</sup>, Eelco Franz<sup>11</sup>, Eva M. Nielsen<sup>12</sup>, Juno Thomas<sup>13</sup>, Arthur Pightling<sup>14</sup>, Benjamin P. Howden<sup>15</sup>, Cheryl L. Tarr<sup>16</sup>, Peter Gerner-Smidt<sup>16</sup>, Simon Cauchemez<sup>4</sup>, Henrik Salje<sup>4,†,#</sup>, Sylvain Brisse<sup>17,#</sup>, Marc Lecuit<sup>1,2,3,18,#,\*</sup> for the *Listeria* CC1 Study Group

<sup>1</sup> Institut Pasteur, Biology of Infection Unit, Paris, France

<sup>2</sup> Institut Pasteur, French National Reference Centre and WHO Collaborating Centre *Listeria*, Paris, France

<sup>3</sup> Inserm U1117, Paris, France

<sup>4</sup> Institut Pasteur, Mathematical Modelling of Infectious Diseases Unit, UMR2000, CNRS, Paris, France.

<sup>5</sup> Institut Systématique Evolution Biodiversité (ISYEB), Museum National d'Histoire Naturelle, CNRS, Sorbonne Université, Université des Antilles, EPHE, Paris, France

<sup>6</sup> PSL University, EPHE, Paris, France

<sup>7</sup> National Institute of Health Dr. Ricardo Jorge, Department of Infectious Diseases, Lisbon, Portugal

<sup>8</sup> Institute of Environmental Science and Research Limited, Christchurch Science Centre, Christchurch, New Zealand

<sup>9</sup> Public Health England, London, UK

<sup>10</sup> Vetsuisse, University of Bern, Bern, Switzerland

<sup>11</sup> National Institute for Public Health and the Environment (RIVM), Centre for Infectious Disease Control, Bilthoven, Netherland

<sup>12</sup> Statens Serum Institut, Copenhagen, Denmark

<sup>13</sup> National Institute for Communicable Diseases, Division of the National Health Laboratory Service, Johannesburg, South Africa

<sup>14</sup> Biostatistics and Bioinformatics, Center for Food Safety and Applied Nutrition, U.S. Food and Drug Administration, College Park, MD, United States

<sup>15</sup> Microbiological Diagnostic Unit Public Health Laboratory, Department of Microbiology and Immunology, The Doherty Institute for Infection and Immunity, University of Melbourne, Victoria, Australia; Infectious Diseases Department, Austin Health, Heidelberg, Victoria, Australia

<sup>16</sup> Centers for Disease Control and Prevention, United States

<sup>17</sup> Institut Pasteur, Biodiversity and Epidemiology of Bacterial Pathogens Unit, Paris, France

<sup>18</sup> Université de Paris, Necker-Enfants Malades University Hospital, Division of Infectious Diseases and Tropical Medicine, Institut Imagine, APHP, Paris, France

### ***Listeria* CC1 Study Group**

Caroline Charlier, Institut Pasteur, French National Reference Center and WHO Collaborating Center *Listeria*, Paris, France; Institut Pasteur, Biology of Infection Unit, Paris-France; Inserm U1117, Paris, France; Université de Paris, Necker-Enfants Malades University Hospital, Department of Infectious Diseases and Tropical Medicine, AP-HP, Paris, France

Guillaume Vales, Institut Pasteur, French National Reference Center and WHO Collaborating Center *Listeria*, Paris, France

Hélène Bracq-Dieye, Institut Pasteur, French National Reference Center and WHO Collaborating Center *Listeria*, Paris, France

Nathalie Tessaud-Rita, Institut Pasteur, French National Reference Center and WHO Collaborating Center *Listeria*, Paris, France

Pierre Thouvenot, Institut Pasteur, French National Reference Center and WHO Collaborating Center *Listeria*, Paris, France

Viviane Chenal-Francois, Institut Pasteur, French National Reference Center and WHO Collaborating Center *Listeria*, Paris, France

Zuzana Kucerova, Centers for Disease Control and Prevention, Atlanta, Georgia, United States

Heather Carleton, Centers for Disease Control and Prevention, Atlanta, Georgia, United States

Steven Stroika, Centers for Disease Control and Prevention, Atlanta, Georgia, United States

Anders Gonçalves da Silva, Microbiological Diagnostic Unit Public Health Laboratory, Department of Microbiology and Immunology, The Doherty Institute for Infection and Immunity, University of Melbourne, Victoria, Australia

Karolina Mercoulia, Microbiological Diagnostic Unit Public Health Laboratory, Department of Microbiology and Immunology, The Doherty Institute for Infection and Immunity, University of Melbourne, Victoria, Australia

Anthony Marius Smith, National Institute for Communicable Diseases, Division of the National Health Laboratory Service, Johannesburg, South Africa.

Jonas T. Björkman, Statens Serum Institut, Copenhagen, Denmark

Anna Oevermann, Division of Neurological Diseases, DCR-VPH, Vetsuisse Faculty, University of Bern, Bern, Switzerland

Lisandra Aguillar-Bultet, Vetsuisse Faculty, University of Bern, Bern, Switzerland

Thijs Bosch, National Institute for Public Health and the Environment (RIVM), Centre for Infectious Disease Control, Bilthoven, Netherland

Sjoerd Kuiling, National Institute for Public Health and the Environment (RIVM), Centre for Infectious Disease Control, Bilthoven, Netherland

Maaïke van den Beld, National Institute for Public Health and the Environment (RIVM), Centre for Infectious Disease Control, Bilthoven, Netherland

Anaïs Passet, Public Health England, London, United Kingdom

Kathie Grant, Public Health England, London, United Kingdom

Leonor Silveira, National Institute of Health Dr. Ricardo Jorge, Department of Infectious Diseases, Lisbon, Portugal

Ângela Pista, National Institute of Health Dr. Ricardo Jorge, Department of Infectious Diseases, Lisbon, Portugal

Mónica Oleastro, National Institute of Health Dr. Ricardo Jorge, Department of Infectious Diseases, Lisbon, Portugal

Sven Halbedel, Consultant Laboratory for *Listeria monocytogenes*, FG11, Robert Koch Institute, Wernigerode, Germany
